# Supplementary material for: Manganese ferrite nanoparticle catalyzed tandem and green synthesis of spirooxindoles
Source: Royal Society of Chemistry journal article supplement (doi:10.1039/c4ra05756b), 2014-01-01

## Manganese ferrite nanoparticles catalyzed tandem and green synthesis of spirooxindoles

H. Naeimi,<sup>a</sup> Z. Rashid,<sup>a</sup> A. H. Zarnani,<sup>b</sup> and R. Ghahremanzadeh<sup>c\*</sup>

<sup>a</sup>Department of Organic Chemistry, Faculty of Chemistry, University of Kashan, Kashan, 87317, I.R. Iran.

<sup>b</sup>Reproductive Immunology Research Center, Avicenna Research Institute, ACECR, Tehran, Iran.

<sup>c</sup>Nanobiotechnology Research Center, Avicenna Research Institute, ACECR, Tehran, Iran. E-mail: [r.ghahremanzadeh@avicenna.ac.ir](mailto:r.ghahremanzadeh@avicenna.ac.ir)

### SUPPORTING INFORMATION

| <i>List of contents</i>                   | <i>Page</i> | <i>List of contents</i>          | <i>Page</i> |
|-------------------------------------------|-------------|----------------------------------|-------------|
| Title, author's name, address             | <b>1</b>    | <sup>1</sup> H NMR of <b>5h</b>  | <b>22</b>   |
| General methods and characterization data | <b>2-8</b>  | <sup>13</sup> C NMR of <b>5h</b> | <b>23</b>   |
| <sup>1</sup> H NMR of <b>5a</b>           | <b>9</b>    | <sup>1</sup> H NMR of <b>5i</b>  | <b>24</b>   |
| <sup>13</sup> C NMR of <b>5a</b>          | <b>10</b>   | <sup>13</sup> C NMR of <b>5i</b> | <b>25</b>   |
| <sup>1</sup> H NMR of <b>5b</b>           | <b>11</b>   | <sup>1</sup> H NMR of <b>5j</b>  | <b>26</b>   |
| <sup>13</sup> C NMR of <b>5b</b>          | <b>12</b>   | <sup>13</sup> C NMR of <b>5j</b> | <b>27</b>   |
| <sup>1</sup> H NMR of <b>5c</b>           | <b>13</b>   | <sup>1</sup> H NMR of <b>5k</b>  | <b>28</b>   |
| <sup>13</sup> C NMR of <b>5c</b>          | <b>14</b>   | <sup>13</sup> C NMR of <b>5k</b> | <b>29</b>   |
| <sup>1</sup> H NMR of <b>5d</b>           | <b>15</b>   | <sup>1</sup> H NMR of <b>5l</b>  | <b>30</b>   |
| <sup>13</sup> C NMR of <b>5d</b>          | <b>16</b>   | <sup>13</sup> C NMR of <b>5l</b> | <b>31</b>   |
| <sup>1</sup> H NMR of <b>5e</b>           | <b>17</b>   |                                  |             |
| <sup>13</sup> C NMR of <b>5e</b>          | <b>18</b>   |                                  |             |
| <sup>1</sup> H NMR of <b>5f</b>           | <b>19</b>   |                                  |             |
| <sup>13</sup> C NMR of <b>5f</b>          | <b>20</b>   |                                  |             |
| <sup>1</sup> H NMR of <b>5g</b>           | <b>21</b>   |                                  |             |

## Experimental Part

The chemicals used in this work were obtained from Fluka and Merck and were used without purification. Melting points were measured on an Electrothermal 9200 apparatus. Mass spectra were recorded on a Shimadzu QP 1100 Ex mass spectrometer operating at an ionization potential of 70 eV. IR spectra were recorded as KBr pellets on a Perkin-Elmer 781 spectrophotometer and an Impact 400 Nicolet FT-IR spectrophotometer.  $^1\text{H}$  NMR and  $^{13}\text{C}$  NMR spectra were recorded in  $\text{DMSO}-d_6$  solvents on a Bruker DRX-400 spectrometer with tetramethylsilane as internal reference. The elemental analyses (C, H, N) were obtained from a Carlo ERBA Model EA 1108 analyzer. X-ray diffraction (XRD) pattern of the as-synthesized material was obtained using a Holland Philips Xpert X-ray powder diffraction (XRD) diffractometer (CuK $\alpha$ , radiation,  $\lambda = 0.154056$  nm), at a scanning speed of  $2^\circ/\text{min}$  from  $10^\circ$  to  $100^\circ$  ( $2\theta$ ). The nanocatalyst was determined using a FEI Quanta 200 scanning electron microscope (SEM) operated at a 20 kV accelerating voltage. The purity determination of the substrates and reaction monitoring were accomplished by TLC on silica-gel polygram SILG/UV 254 plates (from Merck Company).

### Typical experimental procedure for the preparation of catalyst

$\text{MnFe}_2\text{O}_4$  nanoparticles has been prepared following the reported standard protocol by co-precipitation of  $\text{MnCl}_2$  and  $\text{FeCl}_3$  in water in the presence of sodium hydroxide. Briefly,  $\text{MnCl}_2 \cdot 4\text{H}_2\text{O}$  and  $\text{FeCl}_3 \cdot 6\text{H}_2\text{O}$  were taken in molar ratio of  $\text{Mn}^{2+}:\text{Fe}^{3+} = 1:2$  to prepare  $0.3 \text{ mol} \cdot \text{L}^{-1}$  metal ion solution of 100 ml containing  $0.1 \text{ mol} \cdot \text{L}^{-1}$   $\text{Mn}^{2+}$  and  $0.2 \text{ mol} \cdot \text{L}^{-1}$   $\text{Fe}^{3+}$ , then was slowly dropped into 100 ml NaOH solution of  $3 \text{ mol} \cdot \text{L}^{-1}$  at the preheated temperature of  $95^\circ\text{C}$ . After aging for 2 h with continuous stirring, the mixture was filtered, washed and dried at  $60^\circ\text{C}$  for 12 h.

### Typical procedure for the preparation of spiro-furo-pyridine-indoline-carbonitriles **5a-l**:

A mixture of isatin **1** (1 mmol), malononitrile **2** (1 mmol), anilinolactones **3** (1 mmol), and  $\text{MnFe}_2\text{O}_4$  (5 mol%) were taken in PEG-400 (1 mL). The resulting mixture was stirred at  $90^\circ\text{C}$  for an appropriate time. After completion of the reaction as indicated by TLC, the reaction mixture was magnetically concentrated with the aid of an external magnet to separate the catalyst. After separation of the catalyst,  $\text{H}_2\text{O}$  (10 ml) was added to the reaction mixture and was shaken for a few minutes to

dissolve PEG and precipitate the product. The crude product (insoluble in water) was filtered and re-crystallized by ethanol for more purification. The desired pure product was identified by physical and spectroscopic data.

**2-Amino-2',5-dioxo-1-phenyl-5,7-dihydro-1H-spiro[furo[3,4-b]pyridine-4,3'-indoline]-3-carbonitrile (5a):**

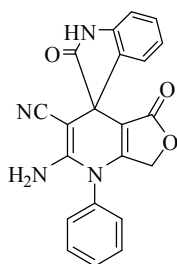

White powder (Yield: 79%). mp>300°C. IR (KBr) ( $\nu_{\max}$ /  $\text{cm}^{-1}$ ): 3385, 2180, 1750, 1683.  $^1\text{H}$  NMR (DMSO- $d_6$ , 400 MHz):  $\delta_{\text{ppm}}$ : 4.34-4.65 (2H, m, OCH<sub>2</sub>) 6.03 (2H, s, NH<sub>2</sub>), 6.81-7.56 (9H, m, ArH), 10.49 (1H, s, NH).  $^{13}\text{C}$  NMR (DMSO- $d_6$ , 100 MHz):  $\delta_{\text{ppm}}$ : 48.2, 60.2, 66.1, 99.2, 109.9, 119.5, 122.5, 125.3, 129.3, 130.7, 134.3, 134.4, 141.8, 152.7, 159.5, 170.0, 178.0. Anal. Calcd for C<sub>21</sub>H<sub>14</sub>N<sub>4</sub>O<sub>3</sub>: C, 68.10; H, 3.81; N, 15.13%;. Found C, 68.16; H, 3.87; N, 15.08%; MS:  $m/z$  370.

**2-Amino-2',5-dioxo-1-p-tolyl-5,7-dihydro-1H-spiro[furo[3,4-b]pyridine-4,3'-indoline]-3 carbonitrile (5b):**

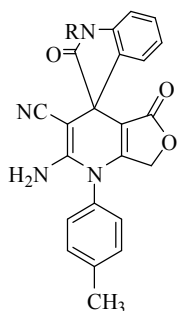

White powder (Yield: 83%). mp>300°C. IR (KBr) ( $\nu_{\max}$ /  $\text{cm}^{-1}$ ): 3454, 2185, 1721, 1682.  $^1\text{H}$  NMR (DMSO- $d_6$ , 400 MHz):  $\delta_{\text{ppm}}$ : 2.37 (3H, s, CH<sub>3</sub>), 4.47-4.64 (2H, m, OCH<sub>2</sub>) 5.99 (2H, s, NH<sub>2</sub>), 6.82-7.44 (8H, m, ArH), 10.48 (1H, s, NH).  $^{13}\text{C}$  NMR (DMSO- $d_6$ , 100 MHz):  $\delta_{\text{ppm}}$ : 21.2, 48.2, 60.0, 66.1, 99.0, 109.8, 119.5, 122.5, 125.3, 128.9, 129.3, 131.2, 131.7, 134.3, 140.3, 141.8, 152.8, 159.6, 170.1, 178.0. Anal. Calcd for C<sub>22</sub>H<sub>16</sub>N<sub>4</sub>O<sub>3</sub>: C, 68.74; H, 4.20; N, 14.58%;. Found C,68.69; H, 4.24; N, 14.53%. MS:  $m/z$  384.

**2-Amino-1-(4-chlorophenyl)-2',5-dioxo-5,7-dihydro-1H-spiro[furo[3,4-b]pyridine-4,3'-indoline]-3-carbonitrile (5c)**

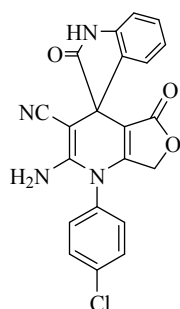

Cream powder (Yield: 80%). mp>300°C. IR (KBr) ( $\nu_{\max}/\text{cm}^{-1}$ ): 3334, 2185, 1722, 1683.  $^1\text{H}$  NMR (DMSO- $d_6$ , 400 MHz):  $\delta_{\text{ppm}}$ : 4.52-4.71 (2H, m, OCH<sub>2</sub>) 6.21 (2H, s, NH<sub>2</sub>), 6.81-7.63 (8H, m, ArH), 10.50 (1H, s, NH).  $^{13}\text{C}$  NMR (DMSO- $d_6$ , 100 MHz):  $\delta_{\text{ppm}}$ : 48.2, 60.5, 66.8, 99.3, 109.8, 115.6, 122.5, 125.4, 129.3, 130.7, 131.3, 133.4, 134.3, 135.3, 141.8, 152.7, 159.4, 170.0, 178.0. Anal. Calcd for C<sub>21</sub>H<sub>13</sub>ClN<sub>4</sub>O<sub>3</sub>: C, 62.31; H, 3.24; N%, 13.84;. Found C,62.36; H, 3.30; N, 13.79%. MS:  $m/z$  406, 404.

**2-Amino-1-(3-chlorophenyl)-2',5-dioxo-5,7-dihydro-1H-spiro[furo[3,4-b]pyridine-4,3'-indoline]-3-carbonitrile (5d):**

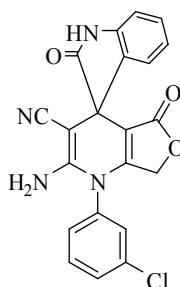

Gray powder (Yield: 77%). mp>300°C. IR (KBr) ( $\nu_{\max}/\text{cm}^{-1}$ ): 3454, 2186, 1720, 1686.  $^1\text{H}$  NMR (DMSO- $d_6$ , 400 MHz):  $\delta_{\text{ppm}}$ : 4.51-4.73 (2H, m, OCH<sub>2</sub>) 6.24 (2H, s, NH<sub>2</sub>), 6.81-7.82 (8H, m, ArH), 10.51 (1H, s, NH).  $^{13}\text{C}$  NMR (DMSO- $d_6$ , 100 MHz):  $\delta_{\text{ppm}}$ : 48.2, 60.2, 66.1, 99.4, 109.8, 119.4, 122.5, 125.4, 128.2, 129.3, 129.7, 130.8, 132.1, 134.2, 134.6, 135.8, 141.8, 152.6, 159.2, 170.0, 177.9. Anal. Calcd for C<sub>21</sub>H<sub>13</sub>ClN<sub>4</sub>O<sub>3</sub>: C, 62.31; H, 3.24; N, 13.84%;. Found C,62.36; H, 3.19; N, 13.78%. MS:  $m/z$  406, 404.

**2-Amino-2',5-dioxo-1-p-tolyl-5,7-dihydro-1H-spiro[furo[3,4-b]pyridine-4,3'-indoline]-3-carbonitrile (5e):**

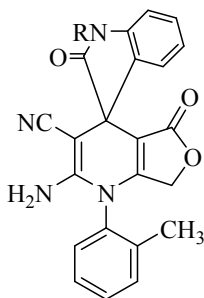

White powder (Yield: 80%). mp>300°C. IR (KBr) ( $\nu_{\max}$ /  $\text{cm}^{-1}$ ): 3448, 2187, 1713, 1680.  $^1\text{H}$  NMR (DMSO- $d_6$ , 400 MHz):  $\delta_{\text{ppm}}$ : 2.30 (3H, s, CH<sub>3</sub>), 4.33-4.70 (2H, m, CH<sub>2</sub>O) 6.06 (2H, s, NH<sub>2</sub>), 6.83-7.46 (8H, m, ArH), 10.52 (1H, s, NH).  $^{13}\text{C}$  NMR (DMSO- $d_6$ , 100 MHz):  $\delta_{\text{ppm}}$ : 17.2, 48.3, 59.7, 66.0, 99.2, 110.0, 119.5, 122.6, 124.8, 128.3, 129.3, 129.8, 131.1, 132.3, 132.9, 134.4, 137.9, 141.7, 152.5, 159.2, 170.0, 177.9. Anal. Calcd for C<sub>22</sub>H<sub>16</sub>N<sub>4</sub>O<sub>3</sub>: C, 68.74; H, 4.20; N, 14.58%;. Found C,68.69; H, 4.14; N, 14.63%. MS:  $m/z$  384.

**2-Amino-1-(2,4-dichlorophenyl)-2',5-dioxo-5,7-dihydro-1H-spiro[furo[3,4-b]pyridine-4,3'-indoline]-3-carbonitrile (5f):**

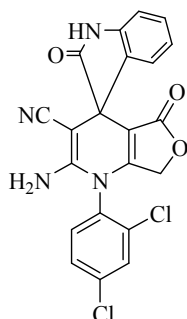

Cream powder (Yield: 79%). mp>300°C. IR (KBr) ( $\nu_{\max}$ /  $\text{cm}^{-1}$ ): 3453, 2186, 1753, 1687.  $^1\text{H}$  NMR (DMSO- $d_6$ , 400 MHz):  $\delta_{\text{ppm}}$ : 4.41-4.80 (2H, m, OCH<sub>2</sub>) 6.43 (2H, s, NH<sub>2</sub>), 6.83-7.98 (7H, m, ArH), 10.56 (1H, s, NH).  $^{13}\text{C}$  NMR (DMSO- $d_6$ , 100 MHz):  $\delta_{\text{ppm}}$ : 48.2, 59.7, 66.0, 100.1, 110.0, 119.3, 122.8, 124.9, 129.4, 129.8, 130.6, 131.1, 133.4, 134.2, 135.4, 136.7, 141.7, 152.3, 158.7, 169.8, 177.7. Anal. Calcd for C<sub>21</sub>H<sub>12</sub>Cl<sub>2</sub>N<sub>4</sub>O<sub>3</sub>: C, 57.42; H, 2.75; N, 12.76%;. Found C,57.48; H, 2.69; N, 12.81%. MS:  $m/z$  440, 438.

Due to very low solubility of the products **5g**, we cannot report the  $^{13}\text{C}$  NMR data for this product.

**2-Amino-1-(4-bromophenyl)-2',5-dioxo-5,7-dihydro-1H-spiro[furo[3,4-b]pyridine-4,3'-indoline]-3-carbonitrile (5g):**

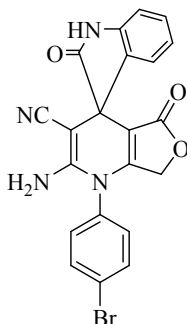

Cream powder (Yield: 75%). mp>300°C. IR (KBr) ( $\nu_{\text{max}}$ /  $\text{cm}^{-1}$ ): 3448, 2192, 1742, 1694.  $^1\text{H}$  NMR (DMSO- $d_6$ , 400 MHz):  $\delta_{\text{ppm}}$ : 4.51-4.72 (2H, m, OCH<sub>2</sub>) 6.21 (2H, s, NH<sub>2</sub>), 6.81-7.78 (7H, m, ArH), 10.47 (1H, s, NH). Anal. Calcd for C<sub>21</sub>H<sub>13</sub>BrN<sub>4</sub>O<sub>3</sub>: C, 56.14; H, 2.92; N, 12.47%. Found C,56.19; H, 2.87; N, 12.53. Ms:  $m/z$  450, 448

**2-Amino-5'-bromo-2',5-dioxo-1-phenyl-5,7-dihydro-1H-spiro[furo[3,4-b]pyridine-4,3'-indoline]-3-carbonitrile (5h):**

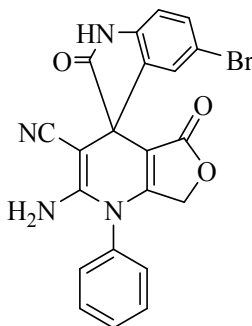

White powder (Yield: 73%). mp>300°C. IR (KBr) ( $\nu_{\text{max}}$ /  $\text{cm}^{-1}$ ): 3340, 2182, 1726, 1675.  $^1\text{H}$  NMR (DMSO- $d_6$ , 400 MHz):  $\delta_{\text{ppm}}$ : 4.45-4.66 (2H, m, OCH<sub>2</sub>) 6.12 (2H, s, NH<sub>2</sub>), 6.80-7.65 (8H, m, ArH), 10.64 (1H, s, NH).  $^{13}\text{C}$  NMR (DMSO- $d_6$ , 100 MHz):  $\delta_{\text{ppm}}$ : 48.5, 59.4, 66.3, 98.3, 111.9, 114.3, 119.3, 128.2, 129.2, 129.5, 130.7, 132.1, 134.3, 136.5, 141.2, 152.9, 159.9, 170.1, 177.7. Anal. Calcd for C<sub>21</sub>H<sub>13</sub>BrN<sub>4</sub>O<sub>3</sub>: C, 56.14; H, 2.92; N, 12.47%. Found C,56.20; H, 2.87; N, 12.52%. Ms:  $m/z$  450, 448.

**2-Amino-5'-bromo-2',5-dioxo-1-o-tolyl-5,7-dihydro-1H-spiro[furo[3,4-b]pyridine-4,3'-indoline]-3-carbonitrile (5i):**

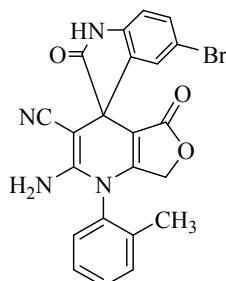

Cream powder (Yield: 76%). mp>300°C. IR (KBr) ( $\nu_{\max}$ /  $\text{cm}^{-1}$ ): 3348, 2178, 1718, 1680.  $^1\text{H}$  NMR (DMSO- $d_6$ , 400 MHz):  $\delta_{\text{ppm}}$ : 2.36 (3H, s, CH<sub>3</sub>), 4.43-4.84 (2H, m, OCH<sub>2</sub>) 6.07 (2H, s, NH<sub>2</sub>), 6.78-7.54 (7H, m, ArH), 10.70 (1H, s, NH).  $^{13}\text{C}$  NMR (DMSO- $d_6$ , 100 MHz):  $\delta_{\text{ppm}}$ : 21.3, 48.5, 59.3, 66.2, 98.2, 111.9, 114.3, 119.4, 128.2, 128.9, 129.2, 130.0, 131.2, 131.6, 132.1, 136.6, 140.4, 141.1, 153.0, 160.0, 170.1, 177.7. Anal. Calcd for C<sub>22</sub>H<sub>15</sub>BrN<sub>4</sub>O<sub>3</sub>: C, 57.04; H, 3.26; N, 12.09%. Found C, 57.10; H, 3.32; N, 12.14%. Ms:  $m/z$  464, 462.

**2-Amino-5'-nitro-2',5-dioxo-1-phenyl-5,7-dihydro-1H-spiro[furo[3,4-b]pyridine-4,3'-indoline]-3-carbonitrile (5j):**

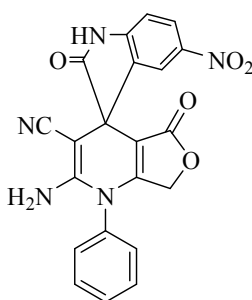

Cream powder (Yield: 81%). mp>300°C. IR (KBr) ( $\nu_{\max}$ /  $\text{cm}^{-1}$ ): 3352, 2188, 1735, 1674.  $^1\text{H}$  NMR (DMSO- $d_6$ , 400 MHz):  $\delta_{\text{ppm}}$ : 4.50-4.68 (2H, m, OCH<sub>2</sub>) 6.23 (2H, s, NH<sub>2</sub>), 7.05-8.31 (8H, m, ArH), 11.25 (1H, s, NH).  $^{13}\text{C}$  NMR (DMSO- $d_6$ , 100 MHz):  $\delta_{\text{ppm}}$ : 48.5, 58.6, 66.5, 97.7, 110.2, 119.2, 121.2, 126.8, 129.2, 129.5, 130.7, 134.2, 135.0, 143.3, 148.4, 153.2, 160.4, 170.1, 178.7. Anal. Calcd for C<sub>21</sub>H<sub>13</sub>N<sub>5</sub>O<sub>5</sub>: C, 60.72; H, 3.15; N, 16.86%. Found C, 60.68; H, 3.20; N, 16.91%. Ms:  $m/z$  415.

**2-Amino-1-(4-bromophenyl)-5'-nitro-2',5-dioxo-5,7-dihydro-1H-spiro[furo[3,4-b]pyridine-4,3'-indoline]-3-carbonitrile (5k):**

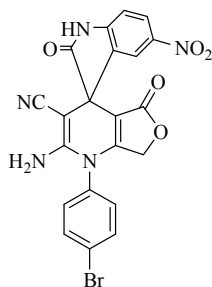

Cream powder (Yield: 84%). mp>300°C. IR (KBr) ( $\nu_{\max}$ /  $\text{cm}^{-1}$ ): 3362, 2187, 1735, 1692.  $^1\text{H}$  NMR (DMSO- $d_6$ , 400 MHz):  $\delta_{\text{ppm}}$ : 4.57-4.69 (2H, m, OCH<sub>2</sub>) 6.40 (2H, s, NH<sub>2</sub>), 7.07-8.33 (7H, m, ArH), 11.24 (1H, s, NH).  $^{13}\text{C}$  NMR (DMSO- $d_6$ , 100 MHz):  $\delta_{\text{ppm}}$ : 48.5, 58.5, 66.5, 97.9, 110.2, 119.1, 121.3, 124.2, 126.8, 131.5, 133.6, 133.7, 135.0, 143.3, 148.4, 153.1, 160.1, 170.0, 178.6. Anal. Calcd for C<sub>21</sub>H<sub>12</sub>BrN<sub>5</sub>O<sub>5</sub>: C, 51.03; H, 2.45; N, 14.17%. Found C,51.09; H, 2.51; N, 14.12%. Ms:  $m/z$  495, 493.

**2-Amino-1-(3-chlorophenyl)-5'-nitro-2',5-dioxo-5,7-dihydro-1H-spiro[furo[3,4-b]pyridine-4,3'-indoline]-3-carbonitrile (5l):**

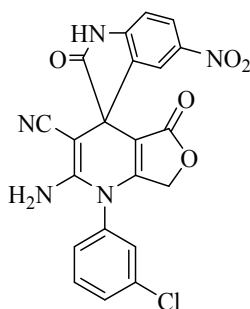

Cream powder (Yield: 85%). mp>300°C. IR (KBr) ( $\nu_{\max}$ /  $\text{cm}^{-1}$ ): 3362, 2180, 1741, 1689.  $^1\text{H}$  NMR (DMSO- $d_6$ , 400 MHz):  $\delta_{\text{ppm}}$ : 4.56-4.74 (2H, m, OCH<sub>2</sub>) 6.42 (2H, s, NH<sub>2</sub>), 7.07-8.37 (7H, m, ArH), 11.24 (1H, s, NH).  $^{13}\text{C}$  NMR (DMSO- $d_6$ , 100 MHz):  $\delta_{\text{ppm}}$ : 48.5, 58.5, 66.6, 97.9, 110.3, 119.3, 121.5, 126.9, 128.2, 129.6, 131.0, 132.1, 134.6, 135.0, 135.5, 143.3, 148.4, 153.1, 160.1, 170.1, 178.7. Anal. Calcd for C<sub>21</sub>H<sub>12</sub>ClN<sub>5</sub>O<sub>5</sub>: C, 56.07; H, 2.69; N, 15.57%. Found C,56.12; H, 2.64; N, 15.61%. Ms:  $m/z$  451, 449.



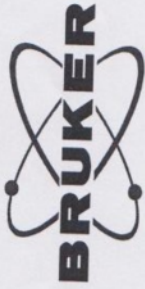

Current Data Parameters  
NAME 3H  
EXPNO 421  
PROCNO 1

F2 - Acquisition Parameters  
Date\_ 20130217  
Time 9.29  
INSTRUM spect  
PROBHD 5 mm Multinucl  
PULPROG zg  
TD 32768  
SOLVENT DMSO  
NS 1  
DS 0  
SWH 11574.074 Hz  
FIDRES 0.353213 Hz  
AQ 1.4156276 sec  
RG 128  
DW 43.200 usec  
DE 6.00 usec  
TE 300.0 K  
D1 5.0000000 sec

===== CHANNEL f1 =====  
NUC1 1H  
P1 9.00 usec  
PL1 -6.00 dB  
SFO1 400.1324710 MHz

F2 - Processing parameters  
SI 32768  
SF 400.1300045 MHz  
WDW EM  
SSB 0  
LB 0.30 Hz  
GB 0  
PC 1.00

10.495  
7.562  
7.481  
7.303  
7.197  
6.999  
6.986  
6.819  
6.039  
4.650  
4.611  
4.505  
4.463  
4.345  
3.474  
3.411  
3.327  
3.142  
2.473  
1.027

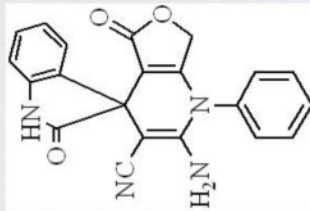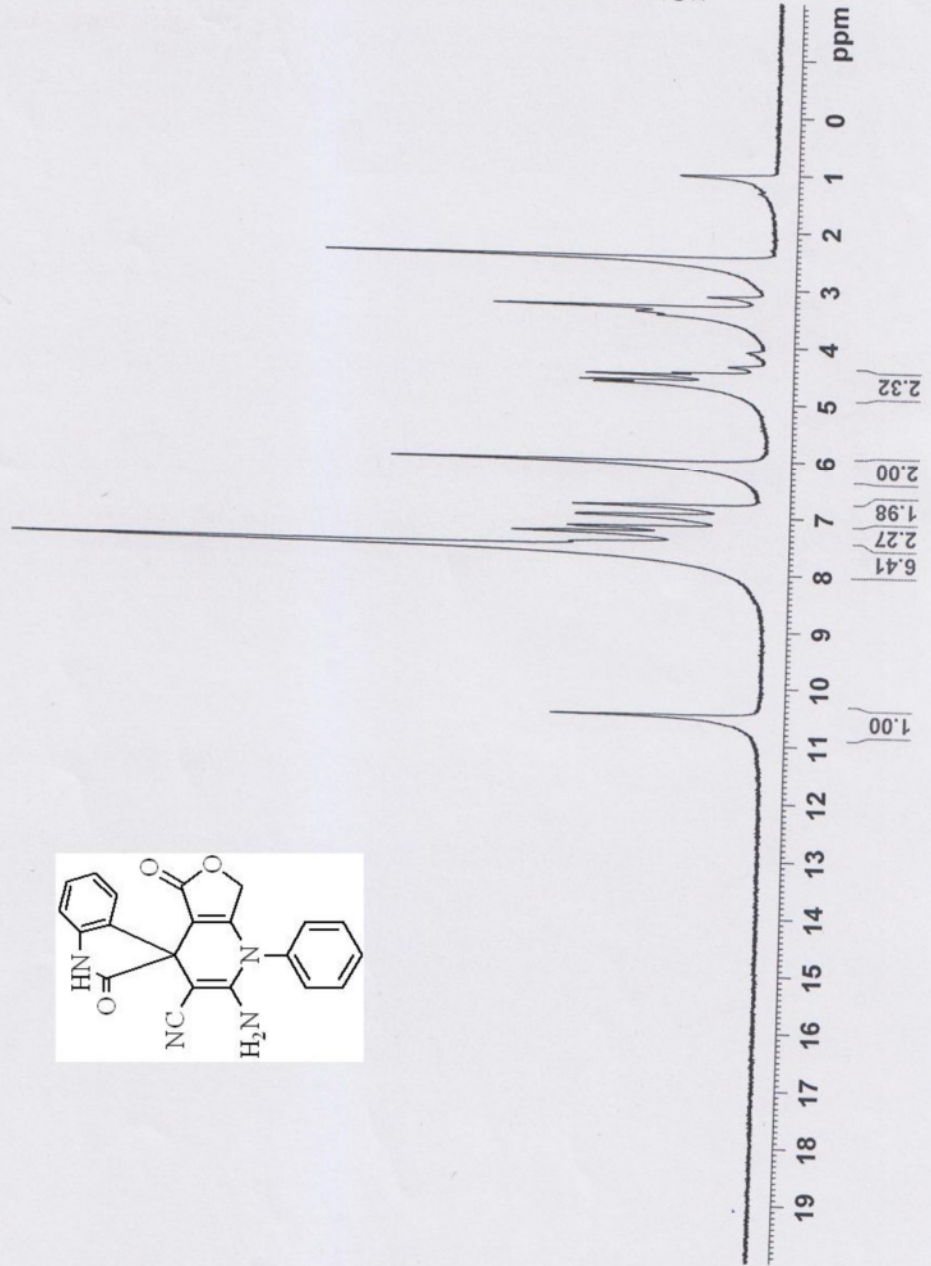

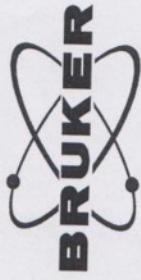

Current Data Parameters  
NAME Carbon13  
EXPNO 2085  
PROCNO 1

F2 - Acquisition Parameters  
Date\_ 20130217  
Time\_ 12.38  
INSTRUM Spect  
PROBHD 5 mm Multinucl  
PULPROG zgpg30  
TD 65536  
SOLVENT DMSO  
NS 1000  
DS 4  
SWH 40404.039 Hz  
FIDRES 0.616517 Hz  
AQ 0.8110580 sec  
RG 32768  
DW 12.375 usec  
DE 6.00 usec  
TE 300.0 K  
D1 1.00000000 sec  
d11 0.03000000 sec  
d12 0.00002000 sec

==== CHANNEL f1 =====  
NUC1 13C  
P1 7.50 usec  
PL1 -2.00 dB  
SF01 100.6204965 MHz

==== CHANNEL f2 =====  
CPDPRG2 waltz16  
NUC2 1H  
PCPD2 80.00 usec  
PL2 -4.00 dB  
PL12 18.50 dB  
PL13 18.50 dB  
SF02 400.1316005 MHz

F2 - Processing parameters  
SI 32768  
SF 100.6127690 MHz  
WDW EM  
SSB 0  
LB 1.00 Hz  
GB 0  
PC 1.40

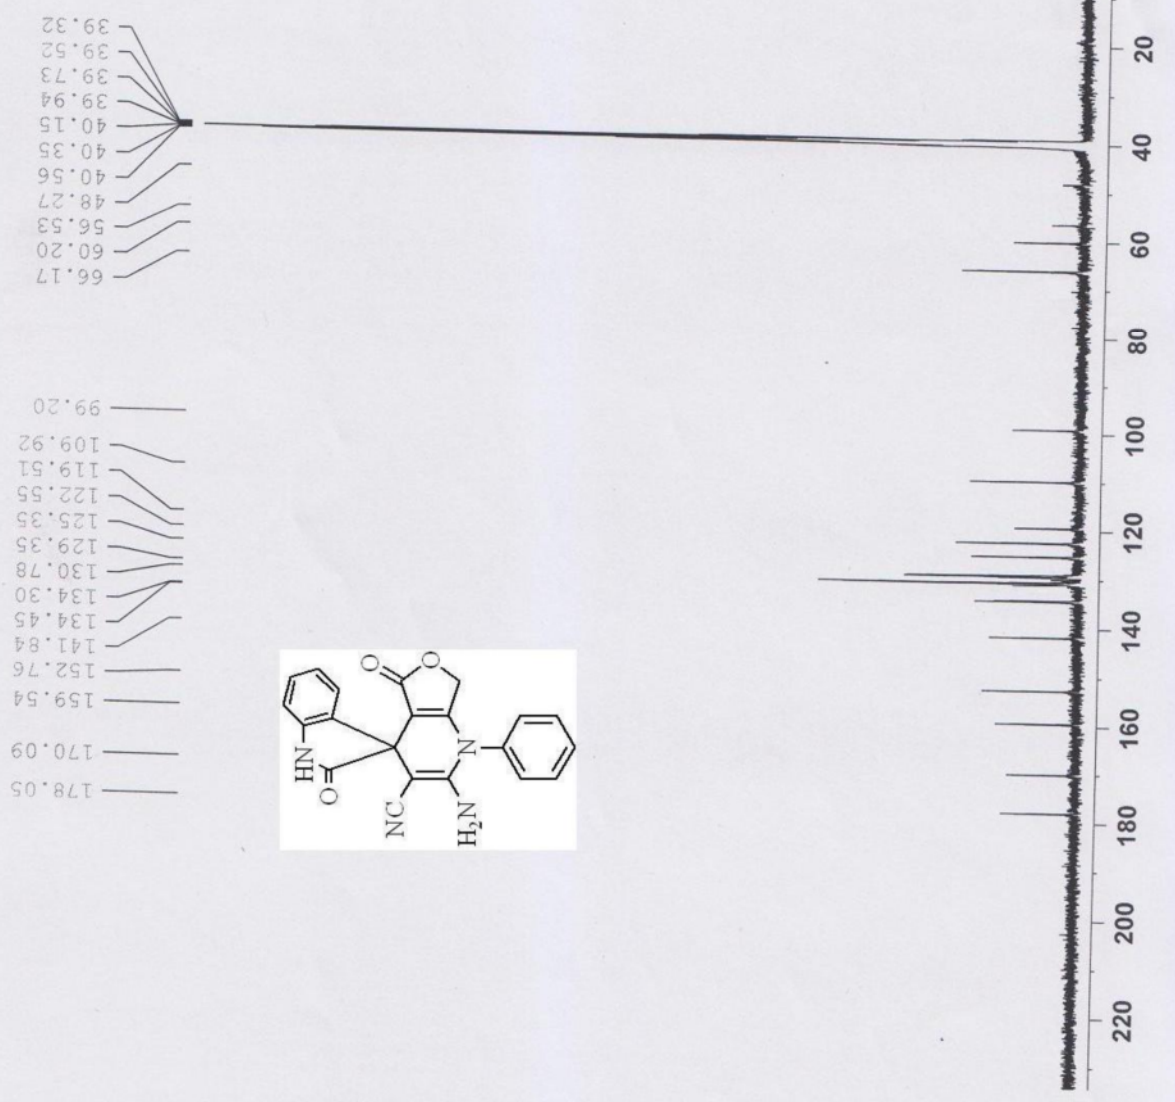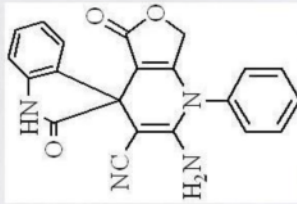

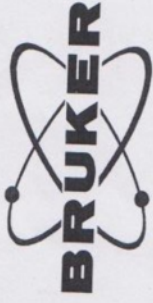

Current Data Parameters  
NAME 3H  
EXPNO 420  
PROCNO 1

F2 - Acquisition Parameters  
Date\_ 20130217  
Time 9.20  
INSTRUM spect  
PROBHD 5 mm Multinucl  
PULPROG zg  
TD 32768  
SOLVENT DMSO  
NS 1  
DS 0  
SWH 11574.074 Hz  
FIDRES 0.353213 Hz  
AQ 1.4156276 sec  
RG 256  
DW 43.200 usec  
DE 6.00 usec  
TE 300.0 K  
D1 5.00000000 sec

==== CHANNEL f1 =====  
NUC1 1H  
P1 9.00 usec  
PL1 -6.00 dB  
SFO1 400.1324710 MHz

F2 - Processing parameters  
SI 32768  
SF 400.1300045 MHz  
WDW EM  
SSB 0  
LB 0.30 Hz  
GB 0  
PC 1.00

10.488  
7.445  
7.372  
7.296  
7.197  
6.998  
6.820  
5.997  
4.644  
4.602  
4.510  
4.470  
3.481  
3.330  
2.479  
2.371

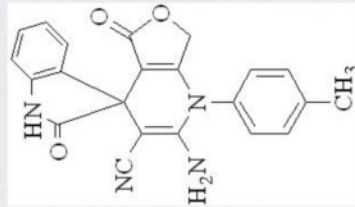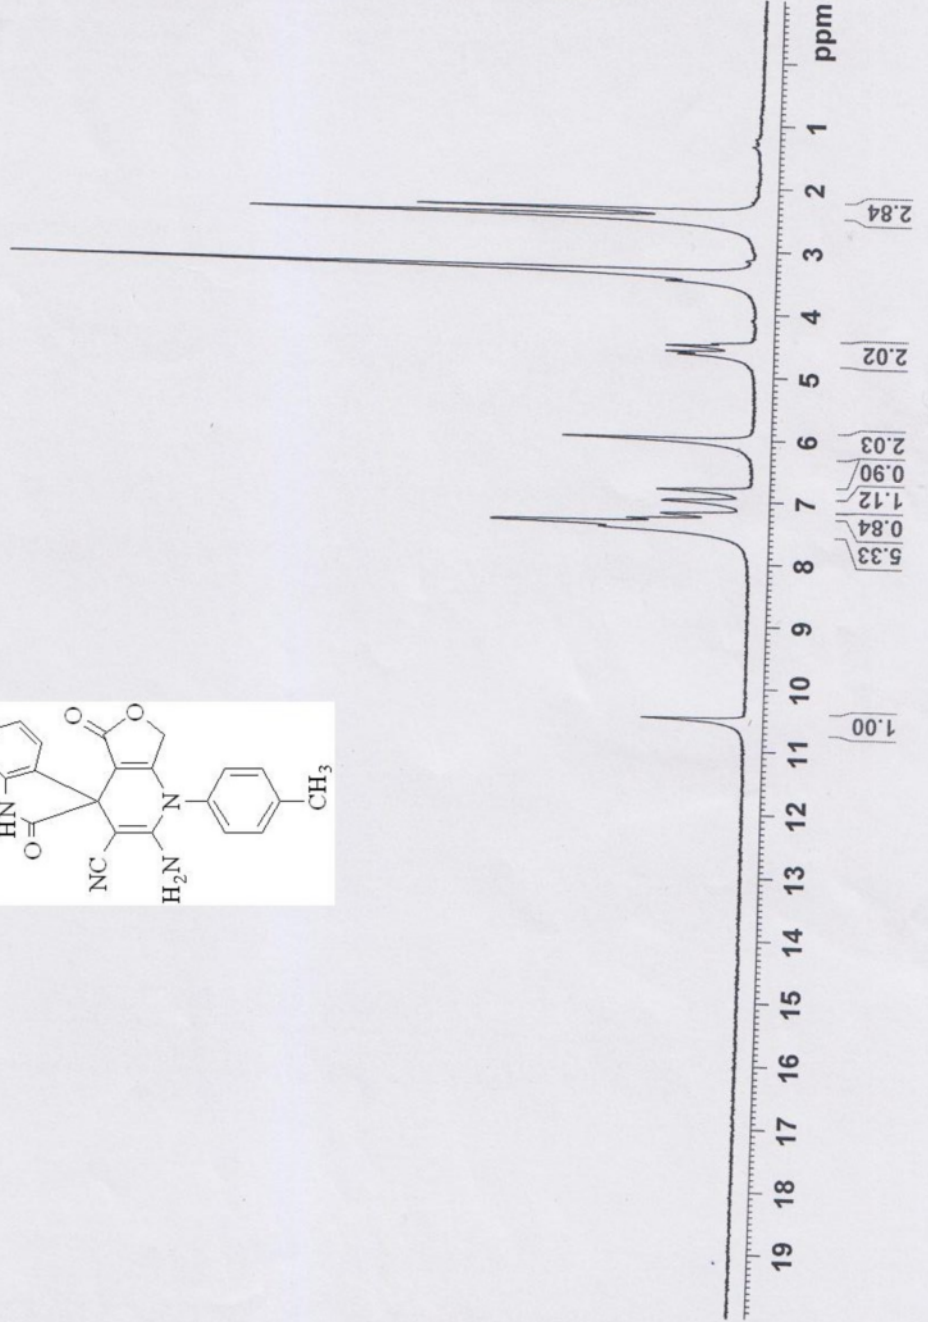

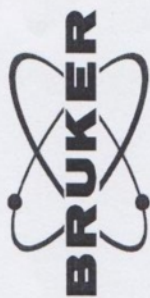

Current Data Parameters  
NAME Carbon13  
EXPNO 2084  
PROCNO 1

F2 - Acquisition Parameters  
Date\_ 20130217  
Time\_ 11.48  
INSTRUM spect  
PROBHD 5 mm Multinucl  
PULPROG zgpg30  
TD 65536  
SOLVENT DMSO  
NS 1000  
DS 4  
SWH 40404.039 Hz  
FIDRES 0.616517 Hz  
AQ 0.8110580 sec  
RG 32768  
DW 12.375 usec  
DE 6.00 usec  
TE 300.0 K  
D1 1.00000000 sec  
d11 0.03000000 sec  
d12 0.00002000 sec

==== CHANNEL f1 =====  
NUC1 13C  
P1 7.50 usec  
PL1 -2.00 dB  
SFO1 100.6204965 MHz

==== CHANNEL f2 =====  
CPDPRG2 waltz16  
NUC2 1H  
PCPD2 80.00 usec  
PL2 -4.00 dB  
PL12 18.50 dB  
PL13 18.50 dB  
SFO2 400.1316005 MHz

F2 - Processing parameters  
SI 32768  
SF 100.6127690 MHz  
WDW EM  
SSB 0  
LB 1.00 Hz  
GB 0  
PC 1.40

178.06  
170.10  
159.67  
152.83  
141.81  
140.36  
134.34  
131.77  
131.27  
129.32  
128.95  
125.32  
122.52  
119.51  
109.89  
99.06  
66.13  
60.05  
48.24  
40.56  
40.36  
40.15  
39.94  
39.73  
39.53  
39.32  
21.28

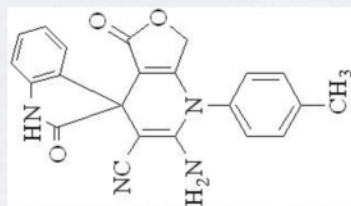

ppm

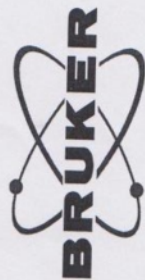

Current Data Parameters  
NAME 3H  
EXPNO 422  
PROCNO 1

F2 - Acquisition Parameters

Date\_ 20130217  
Time 9.33  
INSTRUM spect  
PROBHD 5 mm Multinucl  
PULPROG zg  
TD 32768  
SOLVENT DMSO  
NS 1  
DS 0  
SWH 11574.074 Hz  
FIDRES 0.353213 Hz  
AQ 1.4156276 sec  
RG 512  
DE 43.200 usec  
TE 6.00 usec  
D1 300.0 K  
D11 5.0000000 sec

===== CHANNEL f1 =====  
NUC1 1H  
P1 9.00 usec  
PL1 -6.00 dB  
SFO1 400.1324710 MHz

F2 - Processing parameters  
SI 32768  
SF 400.1300045 MHz  
WDW EM  
SSB 0  
LB 0.30 Hz  
GB 0  
PC 1.00

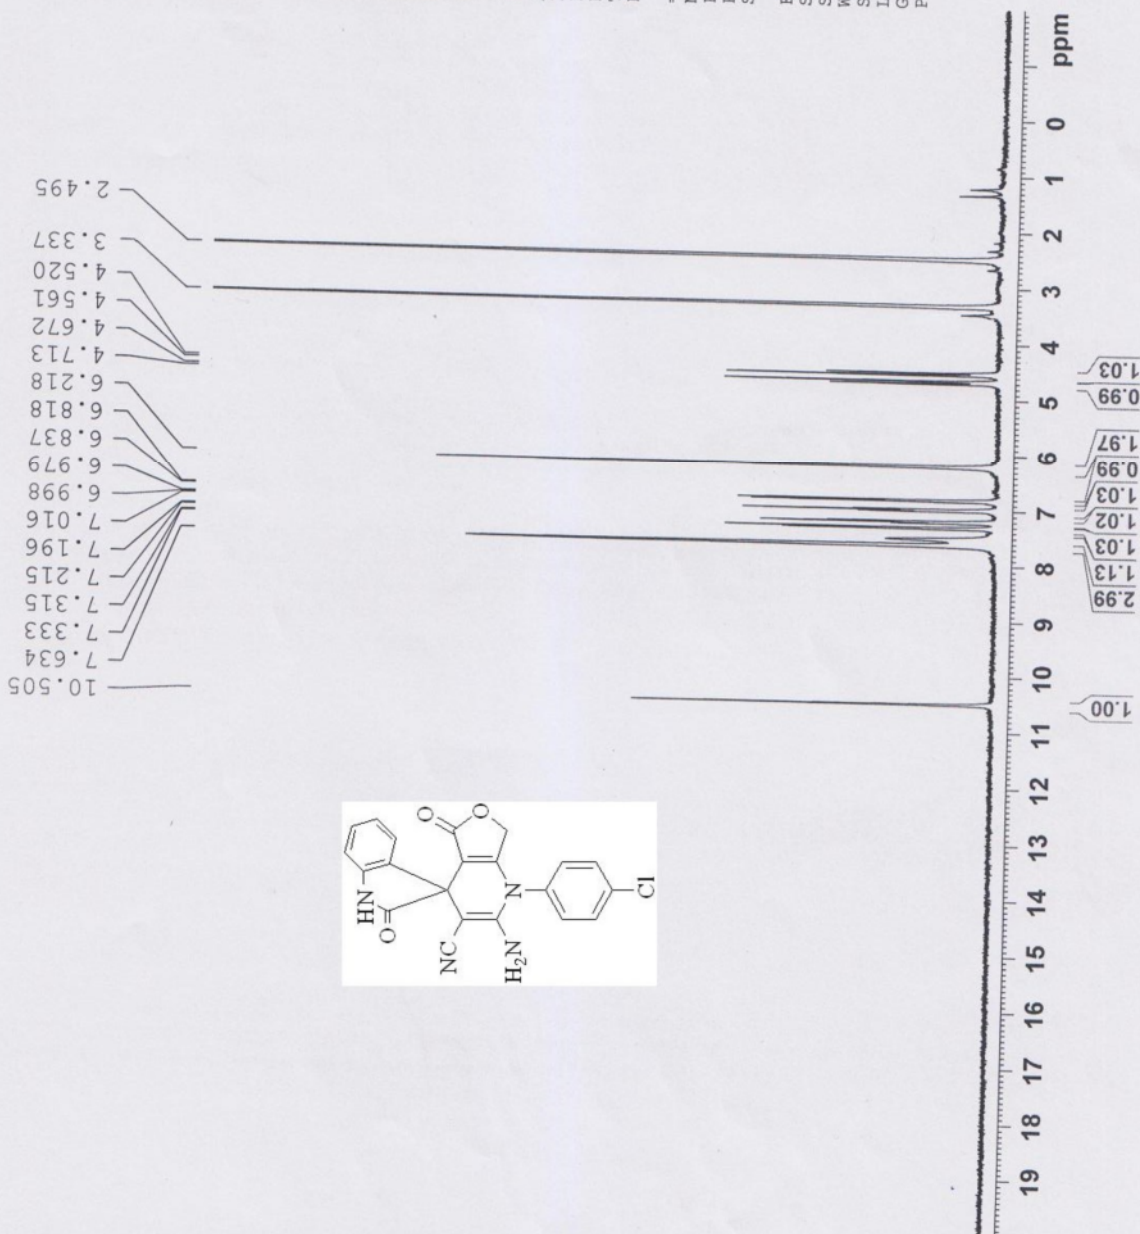

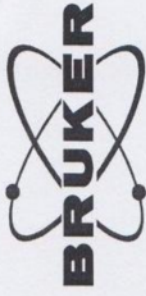

Current Data Parameters  
NAME Carbon13  
EXPNO 2086  
PROCNO 1

F2 - Acquisition Parameters  
Date\_ 20130218  
Time 9.13  
INSTRUM spect  
PROBHD 5 mm Multinucl  
PULPROG zgpg30  
TD 65536  
SOLVENT DMSO  
NS 500  
DS 4  
SWH 40404.039 Hz  
FIDRES 0.616517 Hz  
AQ 0.8110580 sec  
RG 32768  
DW 12.375 usec  
DE 6.00 usec  
TE 300.0 K  
D1 1.00000000 sec  
d11 0.03000000 sec  
d12 0.00002000 sec

==== CHANNEL f1 =====  
NUC1 13C  
P1 7.50 usec  
PL1 -2.00 dB  
SFO1 100.6204965 MHz

==== CHANNEL f2 =====  
CPDPRG2 waltz16  
NUC2 1H  
PCPD2 80.00 usec  
PL2 -4.00 dB  
PL12 18.50 dB  
PL13 18.50 dB  
SFO2 400.1316005 MHz

F2 - Processing parameters  
SI 32768  
SF 100.6127690 MHz  
EM 0  
WDW 0  
SSB 0  
LB 1.00 Hz  
GB 0  
PC 1.40

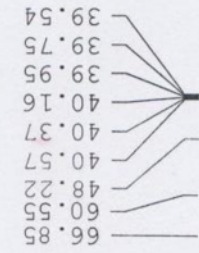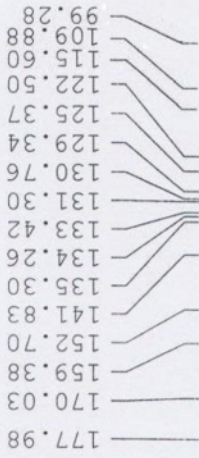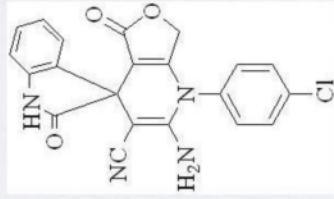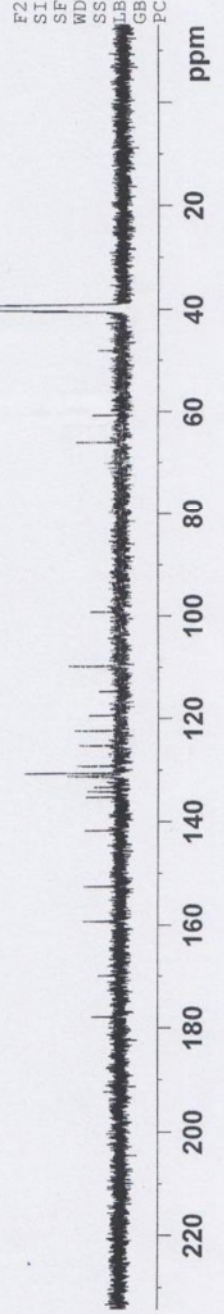

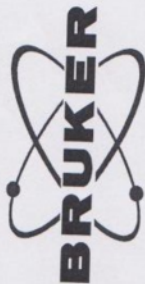

Current Data Parameters  
NAME 3H  
EXPNO 423  
PROCNO 1

F2 - Acquisition Parameters

Date 20130217  
Time 9.58  
INSTRUM spect  
PROBHD 5 mm Multinucl  
PULPROG zg  
TD 32768  
SOLVENT DMSO  
NS 1  
DS 0  
SWH 11574.074 Hz  
FIDRES 0.353213 Hz  
AQ 1.4156276 sec  
RG 287.4  
DW 43.200 usec  
DE 6.00 usec  
TE 300.0 K  
D1 5.00000000 sec

==== CHANNEL f1 =====  
NUC1 1H  
P1 9.00 usec  
PL1 -6.00 dB  
SFO1 400.1324710 MHz

F2 - Processing parameters  
SI 32768  
SF 400.1300045 MHz  
WDW EM  
SSB 0  
LB 0.30 Hz  
GB 0  
PC 1.00

10.511  
7.820  
7.621  
7.585  
7.484  
7.375  
7.326  
7.232  
7.213  
7.194  
7.114  
6.997  
6.834  
6.816  
6.242  
4.734  
4.558  
4.516  
3.339  
2.492

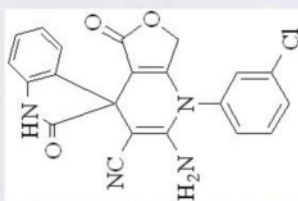

1.00  
1.02  
1.96  
1.04  
1.05  
0.99  
1.23  
0.73  
2.95  
0.65

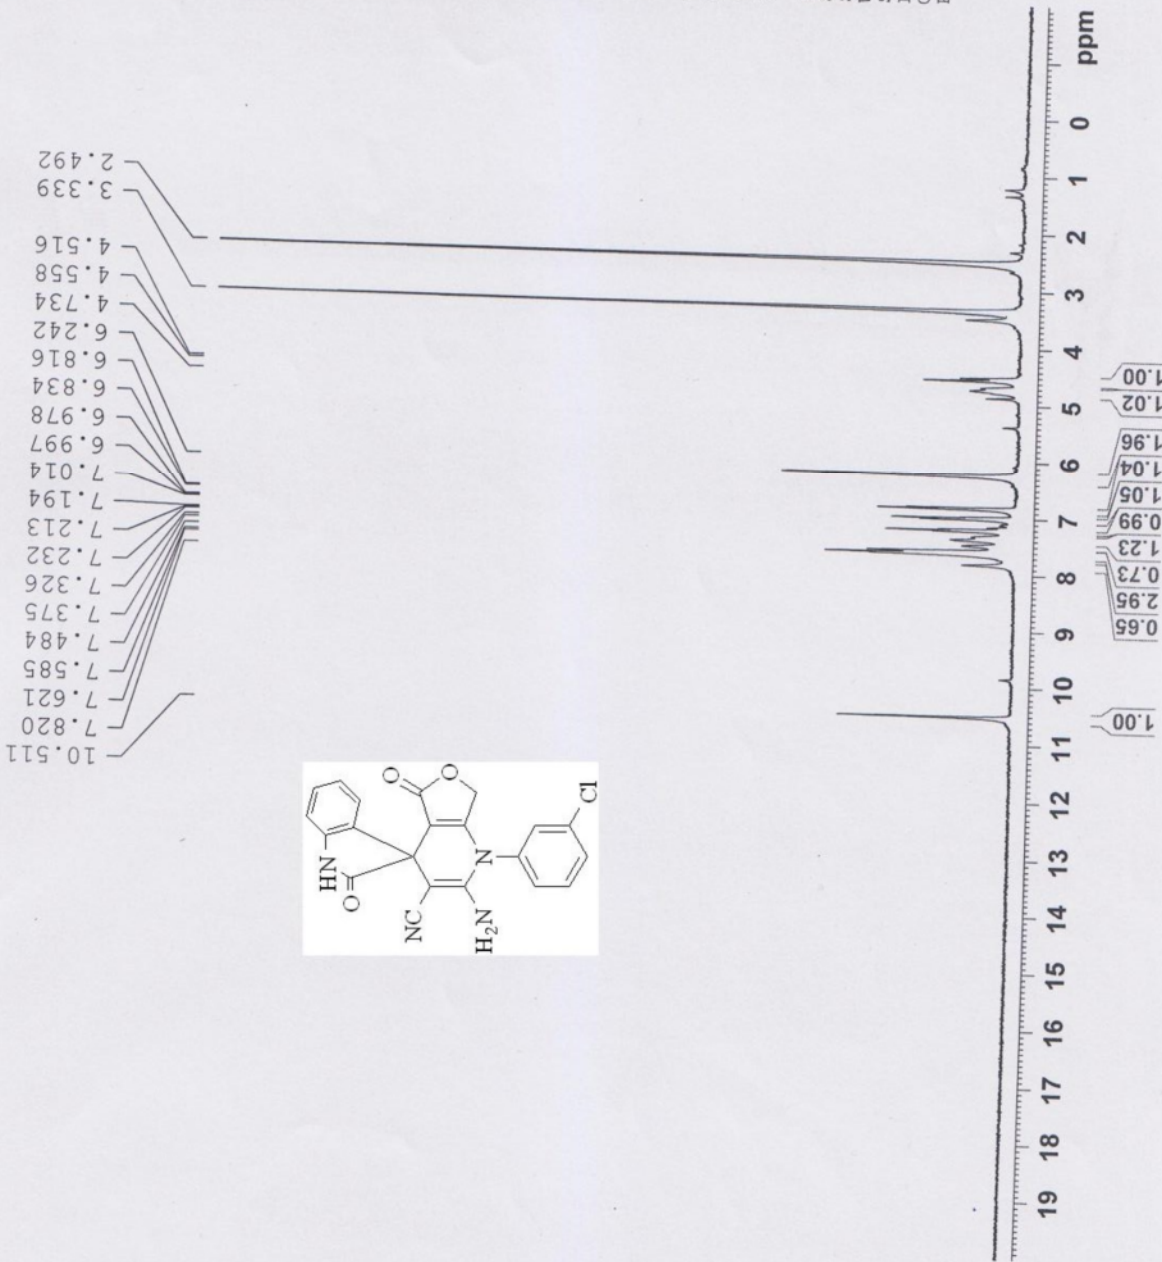

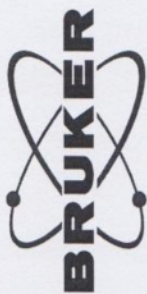

Current Data Parameters  
 NAME Carbon13  
 EXPNO 2083  
 PROCNO 1

F2 - Acquisition Parameters  
 Date\_ 20130217  
 Time\_ 10.51  
 INSTRUM spect  
 PROBHD 5 mm Multinucl  
 PULPROG zgpg30  
 TD 65536  
 SOLVENT DMSO  
 NS 1000  
 DS 4  
 SWH 40404.039 Hz  
 FIDRES 0.616517 Hz  
 AQ 0.8110580 sec  
 RG 32768  
 DW 12.375 usec  
 DE 6.00 usec  
 TE 300.0 K  
 D1 1.00000000 sec  
 d11 0.03000000 sec  
 d12 0.00002000 sec

==== CHANNEL f1 =====  
 NUC1 13C  
 P1 7.50 usec  
 PL1 -2.00 dB  
 SFO1 100.6204965 MHz

==== CHANNEL f2 =====  
 CPDPRG2 waltz16  
 NUC2 1H  
 P2 80.00 usec  
 PL2 -4.00 dB  
 PL12 18.50 dB  
 PL13 18.50 dB  
 SFO2 400.1316005 MHz

F2 - Processing parameters  
 SI 32768  
 SF 100.6127690 MHz  
 WDW EM  
 SSB 0  
 LB 1.00 Hz  
 GB 0  
 PC 1.40

177.95  
170.02  
159.24  
152.63  
141.82  
135.80  
134.63  
134.25  
132.11  
130.82  
129.76  
129.35  
128.26  
125.49  
122.51  
119.45  
109.88  
99.45  
66.19  
60.28  
48.22  
40.58  
40.37  
40.17  
39.96  
39.75  
39.54  
39.33

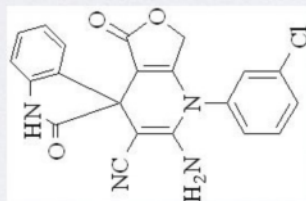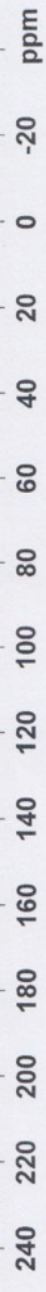



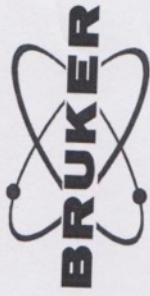

Current Data Parameters  
NAME 3H  
EXPNO 488  
PROCNO 1

F2 - Acquisition Parameters  
Date\_ 20130227  
Time 8.34  
INSTRUM spect  
PROBHD 5 mm Multinucl  
PULPROG zg  
TD 32768  
SOLVENT DMSO  
NS 1  
DS 0  
SWH 11574.074 Hz  
FIDRES 0.353213 Hz  
AQ 1.4156276 sec  
RG 1824.6  
DW 43.200 usec  
DE 6.00 usec  
TE 300.0 K  
D1 5.00000000 sec

==== CHANNEL f1 =====  
NUC1 1H  
P1 9.00 usec  
PL1 -6.00 dB  
SFO1 400.1324710 MHz

F2 - Processing parameters  
SI 32768  
SF 400.1300045 MHz  
WDW EM  
SSB 0  
LB 0.30 Hz  
GB 0  
PC 1.00

10.524  
7.462  
7.307  
7.214  
7.172  
7.106  
7.022  
6.883  
6.836  
6.069  
4.704  
4.674  
4.662  
4.370  
4.334  
3.488  
3.461  
3.328  
2.653  
2.487  
2.396  
2.306  
2.246

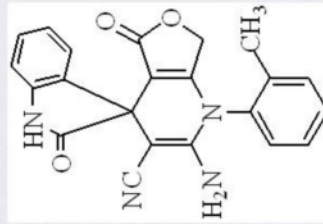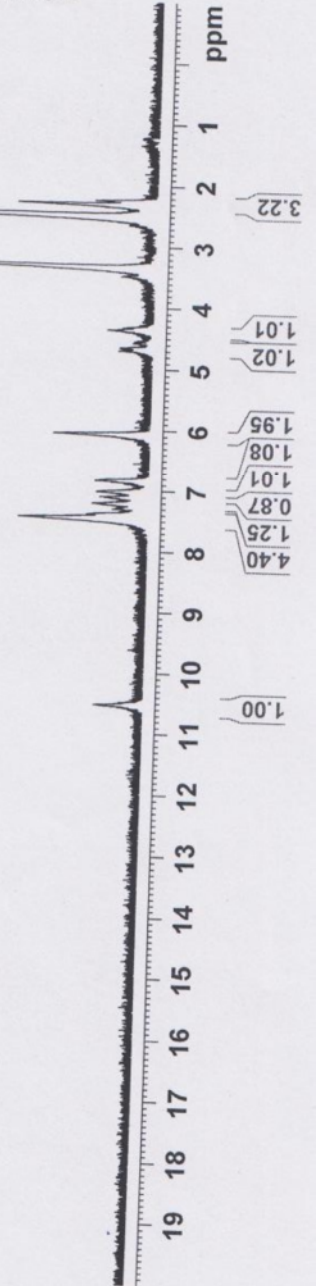

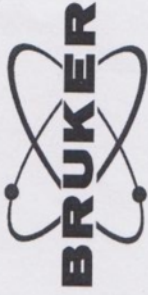

Current Data Parameters  
NAME Carbon13  
EXPNO 2096  
PROCNO 1

F2 - Acquisition Parameters

Date\_ 20130227  
Time 10.15  
INSTRUM spect  
PROBHD 5 mm Multinucl  
PULPROG zgpg30  
TD 65536  
SOLVENT DMSO  
NS 1000  
DS 4  
SWH 40404.039 Hz  
FIDRES 0.616517 Hz  
AQ 0.8110580 sec  
RG 32768  
DW 12.375 usec  
DE 6.00 usec  
TE 300.0 K  
D1 1.00000000 sec  
d11 0.03000000 sec  
d12 0.00002000 sec

=====  
CHANNEL f1  
NUC1 13C  
P1 7.50 usec  
PL1 -2.00 dB  
SFO1 100.6204965 MHz

=====  
CHANNEL f2  
CPDPRG2 waltz16  
NUC2 1H  
PCPD2 80.00 usec  
PL2 -4.00 dB  
PL12 18.50 dB  
PL13 18.50 dB  
SFO2 400.1316005 MHz

F2 - Processing parameters  
SI 32768  
SF 100.6127690 MHz  
WDW EM  
SSB 0  
LB 1.00 Hz  
GB 0  
PC 1.40

177.92  
170.09  
159.25  
152.53  
141.79  
137.98  
134.44  
132.94  
132.30  
131.15  
129.84  
129.37  
128.38  
124.84  
122.66  
119.50  
110.04  
99.28

66.02  
59.71  
48.33  
40.58  
40.37  
40.16  
39.96  
39.75  
39.54  
39.33  
17.27

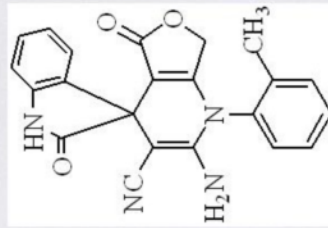

220 200 180 160 140 120 100 80 60 40 20 0 ppm

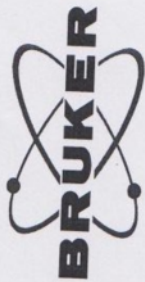

Current Data Parameters  
NAME 3H  
EXPNO 489  
PROCNO 1

F2 - Acquisition Parameters

Date\_ 20130227  
Time\_ 12.15  
INSTRUM spect  
PROBHD 5 mm Multinucl  
PULPROG zg  
TD 32768  
SOLVENT DMSO  
NS 1  
DS 0  
SWH 11574.074 Hz  
FIDRES 0.353213 Hz  
AQ 1.4156276 sec  
RG 203.2  
DW 43.200 usec  
DE 6.00 usec  
TE 300.0 K  
D1 5.00000000 sec

==== CHANNEL f1 =====  
NUC1 1H  
P1 9.00 usec  
PL1 -6.00 dB  
SFO1 400.1324710 MHz

F2 - Processing parameters

SI 32768  
SF 400.1300045 MHz  
WDW EM  
SSB 0  
LB 0.30 Hz  
GB 0  
PC 1.00

10.561  
7.980  
7.733  
7.648  
7.217  
7.145  
7.005  
6.838  
6.430  
4.801  
4.761  
4.458  
4.417  
3.352  
2.492

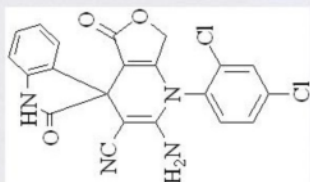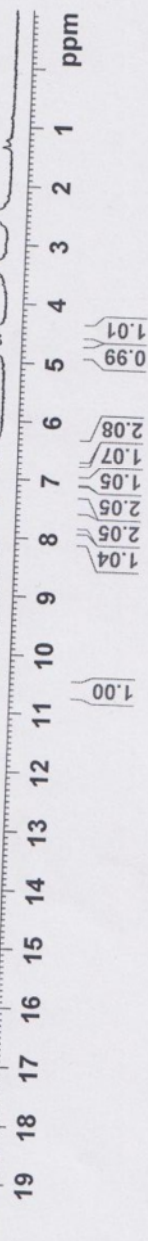

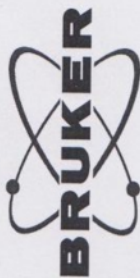

Current Data Parameters  
NAME Carbon13  
EXPNO 2097  
PROCNO 1

F2 - Acquisition Parameters  
Date\_ 20130227  
Time 13.03  
INSTRUM spect  
PROBHD 5 mm Multinucl  
PULPROG zgpg30  
TD 65536  
SOLVENT DMSO  
NS 1000  
DS 4  
SWH 40404.039 Hz  
FIDRES 0.616517 Hz  
AQ 0.8110580 sec  
RG 32768  
DW 12.375 usec  
DE 6.00 usec  
TE 300.0 K  
D1 1.00000000 sec  
d11 0.03000000 sec  
d12 0.00002000 sec

==== CHANNEL f1 =====  
NUC1 13C  
P1 7.50 usec  
PL1 -2.00 dB  
SFO1 100.6204965 MHz

==== CHANNEL f2 =====  
CPDPRG2 waltz16  
NUC2 1H  
PCPD2 80.00 usec  
PL2 -4.00 dB  
PL12 18.50 dB  
PL13 18.50 dB  
SFO2 400.1316005 MHz

F2 - Processing parameters  
SI 32768  
SF 100.6127690 MHz  
WDW EM  
SSB 0  
LB 1.00 Hz  
GB 0  
PC 1.40

66.00  
59.71  
48.20  
40.55  
40.35  
40.14  
39.93  
39.73  
39.52  
39.31

177.74  
169.82  
158.74  
152.39  
141.78  
136.76  
135.43  
134.23  
133.48  
131.15  
130.65  
129.85  
129.45  
124.94  
122.80  
119.38  
110.04  
100.11

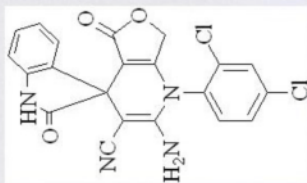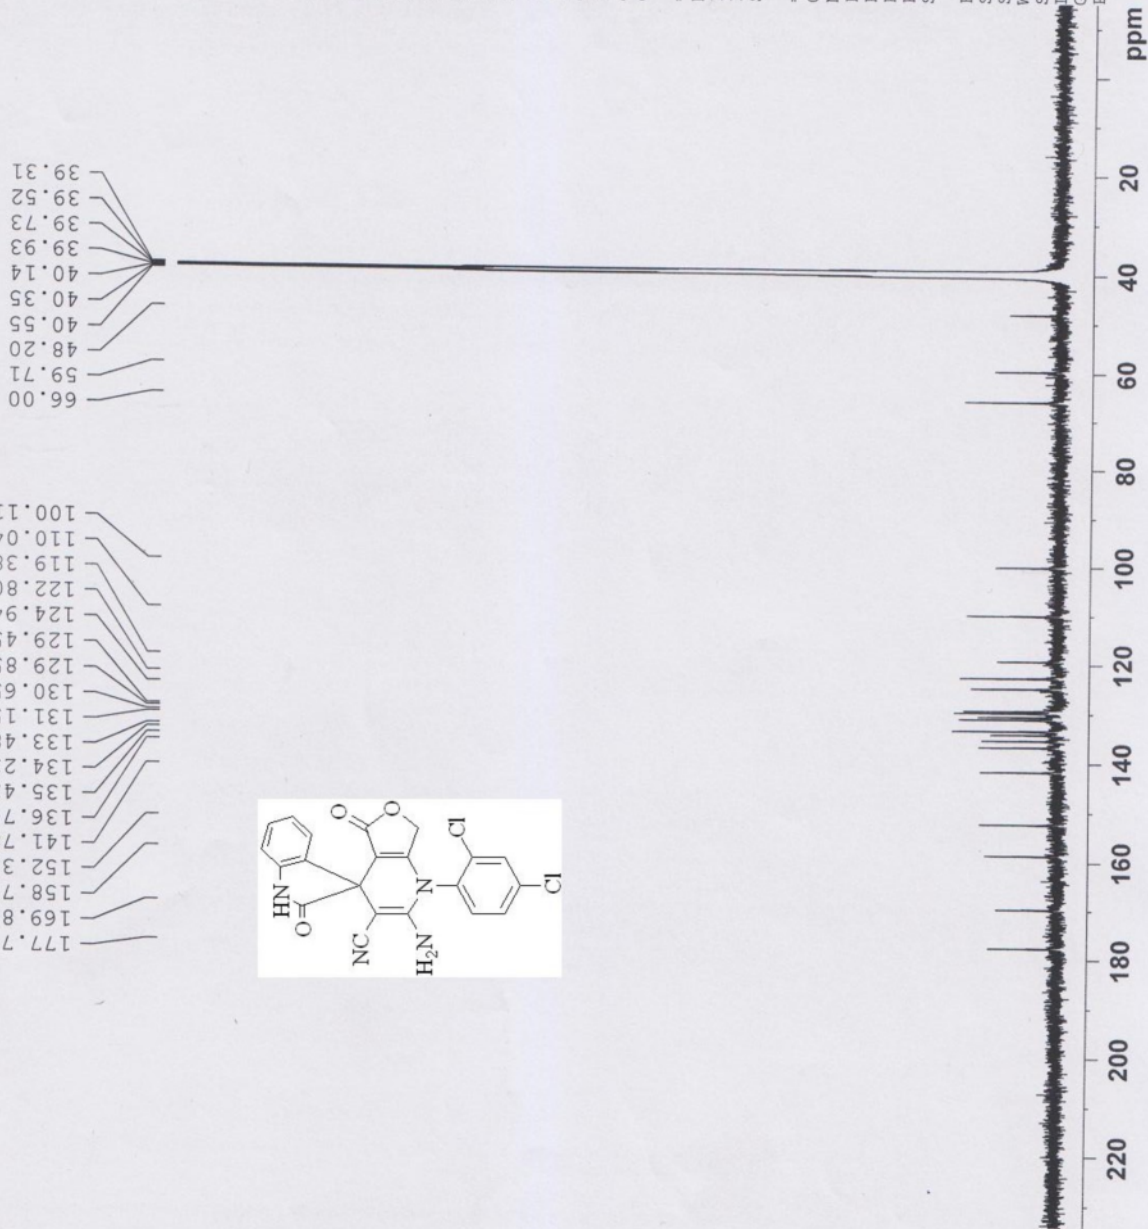

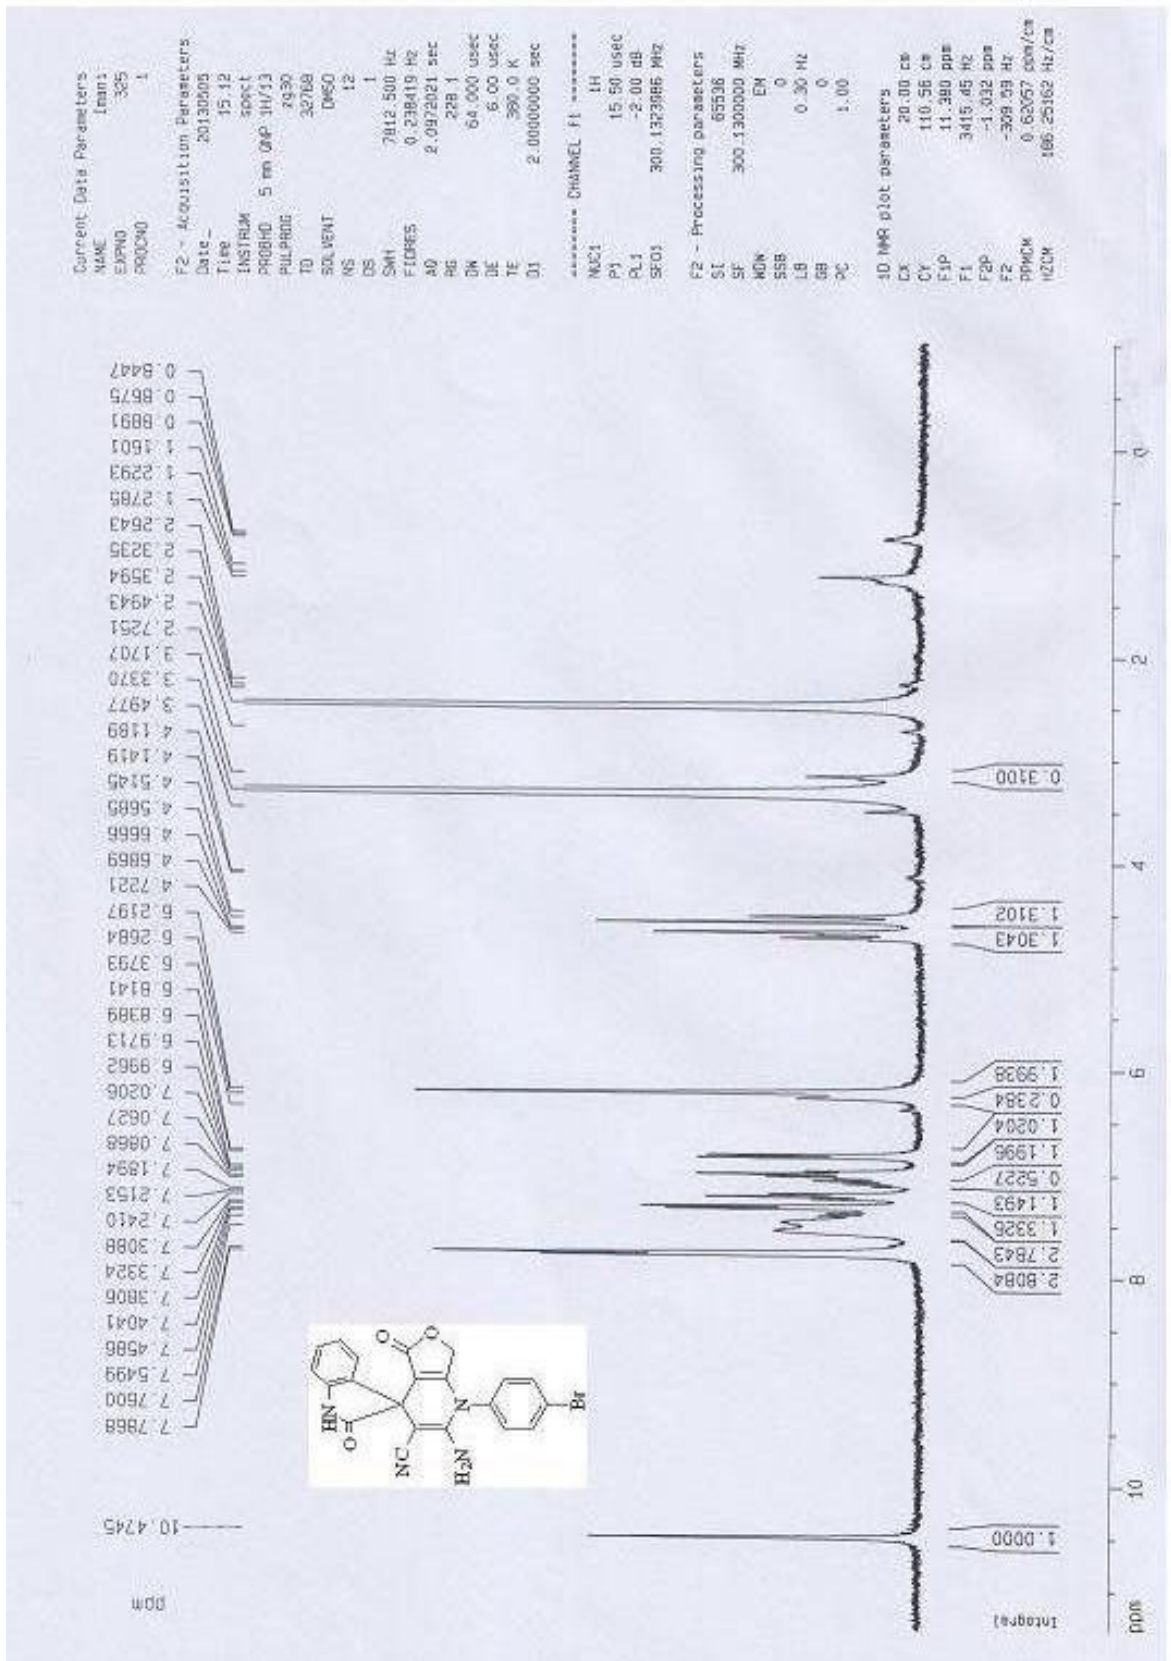

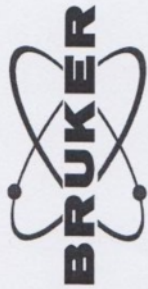

Current Data Parameters  
 NAME 3H  
 EXPNO 582  
 PROCNO 1

F2 - Acquisition Parameters  
 Date\_ 20130312  
 Time 13.44  
 INSTRUM spect  
 PROBHD 5 mm Multinucl  
 PULPROG zg  
 TD 32768  
 SOLVENT DMSO  
 NS 16  
 DS 0  
 SWH 11574.074 Hz  
 FIDRES 0.353213 Hz  
 AQ 1.4156276 sec  
 RG 1625.5  
 DW 43.200 usec  
 DE 6.00 usec  
 TE 300.0 K  
 D1 5.00000000 sec

==== CHANNEL f1 =====  
 NUC1 1H  
 P1 9.00 usec  
 PL1 -6.00 dB  
 SFO1 400.1324710 MHz

F2 - Processing parameters  
 SI 32768  
 SF 400.1300045 MHz  
 WDW EM  
 SSB 0  
 LB 0.30 Hz  
 GB 0  
 PC 1.00

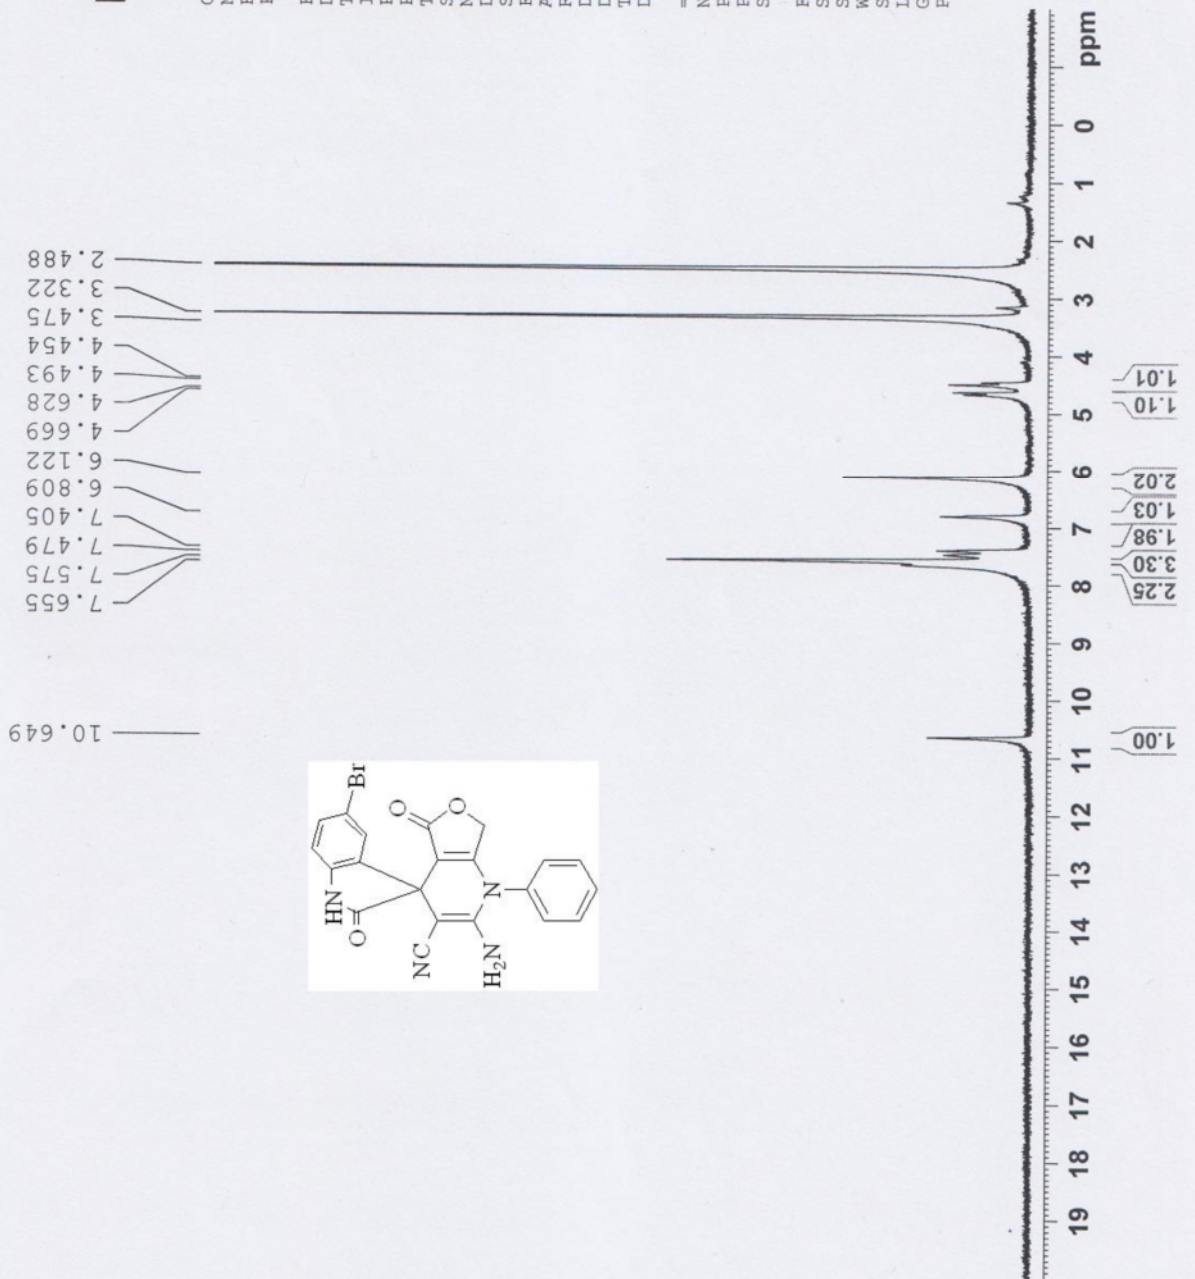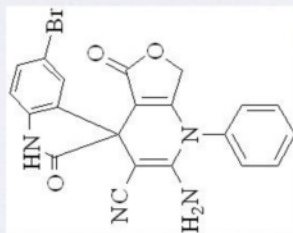

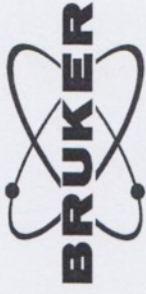

Current Data Parameters  
NAME Carbon13  
EXPNO 2120  
PROCNO 1

F2 - Acquisition Parameters

Date\_ 20130312  
Time 14.40  
INSTRUM spect  
PROBHD 5 mm Multinucl  
PULPROG zgpg30  
TD 65536  
SOLVENT DMSO  
NS 1000  
DS 4  
SWH 40404.039 Hz  
FIDRES 0.616517 Hz  
AQ 0.8110580 sec  
RG 32768  
DW 12.375 usec  
DE 6.00 usec  
TE 300.0 K  
D1 1.00000000 sec  
d11 0.03000000 sec  
d12 0.00002000 sec

==== CHANNEL f1 =====  
NUC1 13C  
P1 7.50 usec  
PL1 -2.00 dB  
SFO1 100.6204965 MHz

==== CHANNEL f2 =====  
CPDPRG2 waltz16  
NUC2 1H  
PCPD2 80.00 usec  
PL2 -4.00 dB  
PL12 18.50 dB  
PL13 18.50 dB  
SFO2 400.1316005 MHz

F2 - Processing parameters  
SI 32768  
SF 100.6127690 MHz  
WDW EM  
SSB 0  
LB 1.00 Hz  
GB 0  
FC 1.40

66.31  
59.48  
48.57  
40.61  
40.41  
40.20  
39.99  
39.78  
39.57  
39.36

177.73  
170.12  
159.91  
152.90  
141.23  
136.57  
134.33  
132.16  
130.73  
129.50  
129.24  
128.27  
119.38  
114.36  
111.90  
98.39

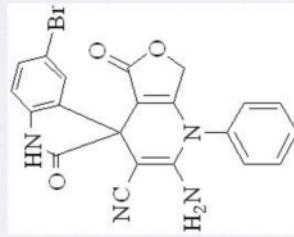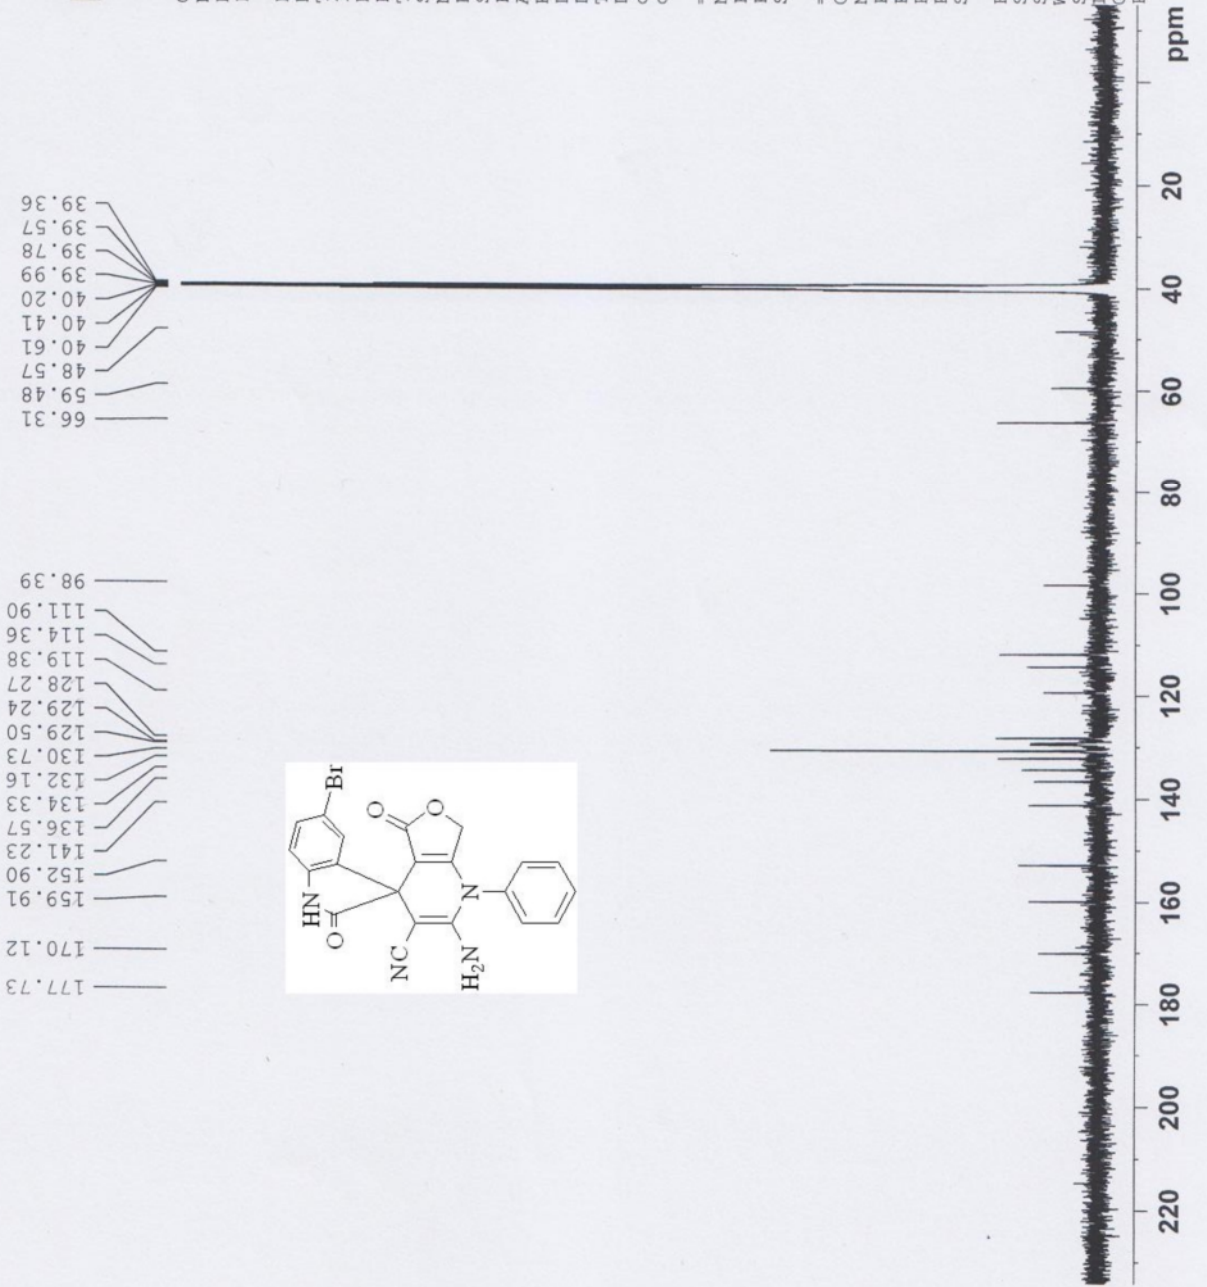

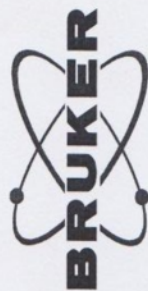

Current Data Parameters  
NAME 3H  
EXPNO 583  
PROCNO 1

F2 - Acquisition Parameters

Date\_ 20130312  
Time\_ 13.51  
INSTRUM spect  
PROBHD 5 mm Multinucl  
PULPROG zg  
TD 32768  
SOLVENT DMSO  
NS 16  
DS 0  
SWH 11574.074 Hz  
FIDRES 0.353213 Hz  
AQ 1.4156276 sec  
RG 1149.4  
DW 43.200 usec  
DE 6.00 usec  
TE 300.0 K  
D1 5.00000000 sec

==== CHANNEL f1 =====  
NUC1 1H  
P1 9.00 usec  
PL1 -6.00 dB  
SFO1 400.1324710 MHz

F2 - Processing parameters

SI 32768  
SF 400.1300045 MHz  
WDW EM  
SSB 0  
LB 0.30 Hz  
GB 0  
PC 1.00

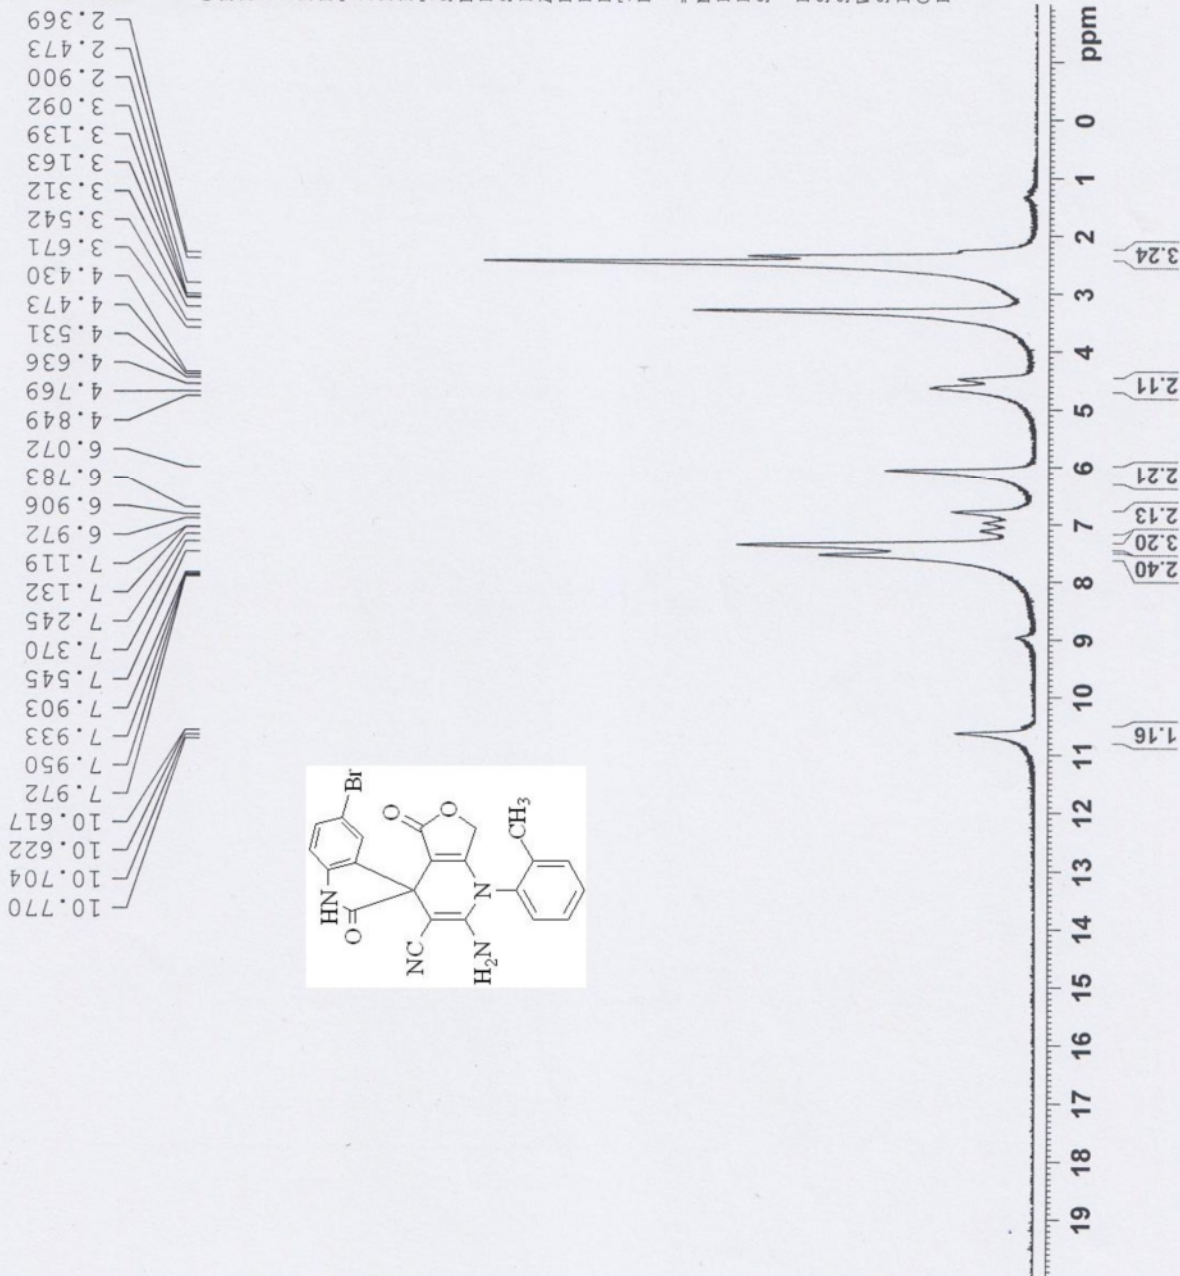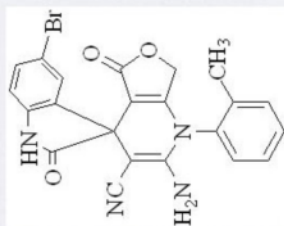



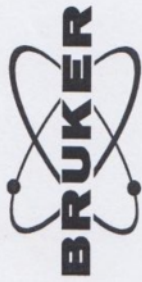

Current Data Parameters  
NAME Carbon13  
EXPNO 2121  
PROCNO 1

F2 - Acquisition Parameters

Date 20130312  
Time 15.30  
INSTRUM spect  
PROBHD 5 mm Multinucl  
PULPROG zgpg30  
TD 65536  
SOLVENT DMSO  
NS 1000  
DS 4  
SWH 40404.039 Hz  
FIDRES 0.616517 Hz  
AQ 0.8110580 sec  
RG 32768  
DW 12.375 usec  
DE 6.00 usec  
TE 300.0 K  
D1 1.00000000 sec  
d11 0.03000000 sec  
d12 0.00002000 sec

==== CHANNEL f1 =====  
NUC1 13C  
P1 7.50 usec  
PL1 -2.00 dB  
SFO1 100.6204965 MHz

==== CHANNEL f2 =====  
CPDPRG2 waltz16  
NUC2 1H  
PCPD2 80.00 usec  
PL2 -4.00 dB  
PL12 18.50 dB  
PL13 18.50 dB  
SFO2 400.1316005 MHz

F2 - Processing parameters  
SI 32768  
SF 100.6127690 MHz  
WDW EM  
SSB 0  
LB 1.00 Hz  
GB 0  
PC 1.40

21.30  
39.58  
39.79  
39.99  
40.19  
40.40  
40.40  
48.54  
59.34  
66.29  
98.29  
111.90  
114.32  
119.42  
128.27  
128.94  
128.94  
129.26  
130.08  
131.23  
131.68  
131.68  
132.15  
136.60  
140.41  
141.18  
141.18  
153.01  
160.08  
170.11  
177.76

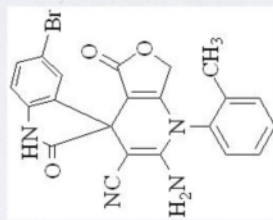

ppm

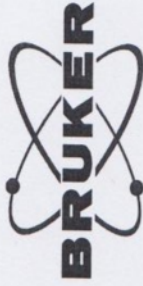

Current Data Parameters  
NAME 3H  
EXPNO 601  
PROCNO 1

F2 - Acquisition Parameters  
Date\_ 20130316  
Time\_ 14.12  
INSTRUM spect  
PROBHD 5 mm Multinucl  
PULPROG zg  
TD 32768  
SOLVENT DMSO  
NS 16  
DS 0  
SWH 11574.074 Hz  
FIDRES 0.353213 Hz  
AQ 1.4156276 sec  
RG 1290.2  
DW 43.200 usec  
DE 6.00 usec  
TE 300.0 K  
D1 5.00000000 sec

==== CHANNEL f1 =====  
NUC1 1H  
P1 9.00 usec  
PL1 -6.00 dB  
SFO1 400.1324710 MHz

F2 - Processing parameters  
SI 32768  
SF 400.1300045 MHz  
WDW EM  
SSB 0  
LB 0.30 Hz  
GB 0  
PC 1.00

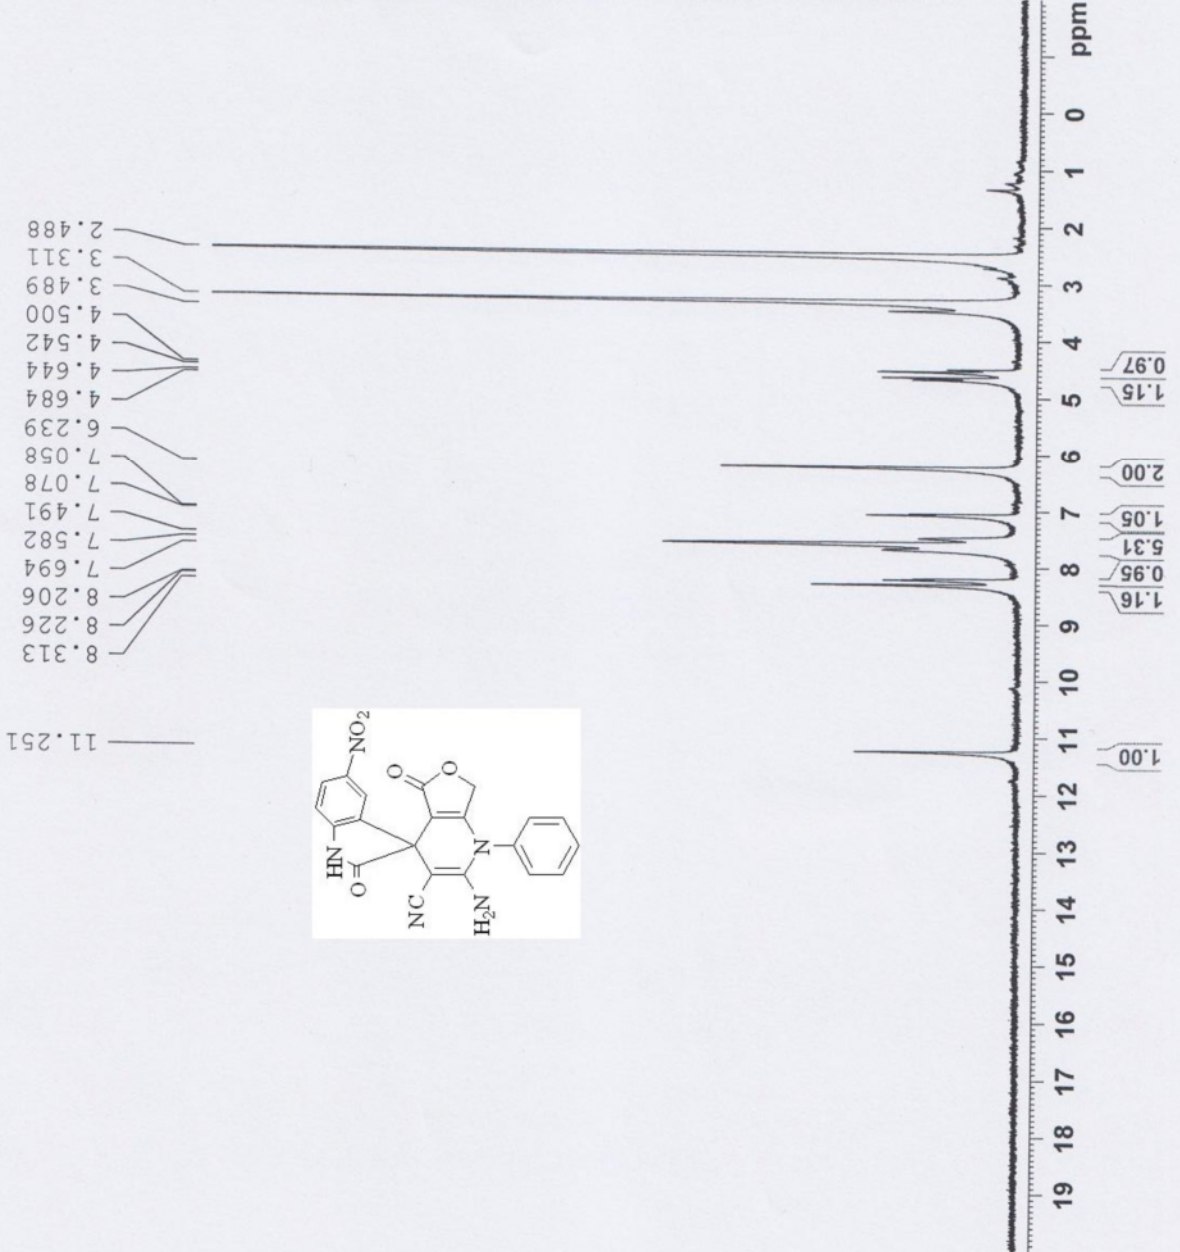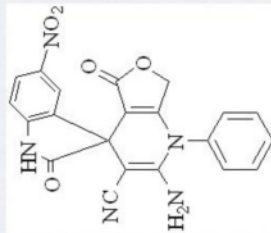

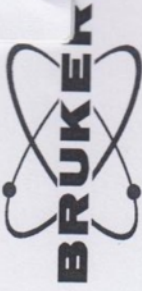

Current Data Parameters  
NAME Carbon13  
EXPNO 2132  
PROCNO 1

F2 - Acquisition Parameters  
Date\_ 20130317  
Time\_ 9.26  
INSTRUM spect  
PROBHD 5 mm Multinucl  
PULPROG zgpg30  
TD 65536  
SOLVENT DMSO  
NS 1000  
DS 4  
SWH 40404.039 Hz  
FIDRES 0.616517 Hz  
AQ 0.8110580 sec  
RG 32768  
DM 12.375 usec  
DE 6.00 usec  
TE 300.0 K  
D1 1.00000000 sec  
d11 0.03000000 sec  
d12 0.00002000 sec

==== CHANNEL f1 =====  
NUC1 13C  
P1 7.50 usec  
PL1 -2.00 dB  
SF01 100.6204965 MHz

==== CHANNEL f2 =====  
CPDPRG2 waltz16  
NUC2 1H  
PCPD2 80.00 usec  
PL2 -4.00 dB  
PL12 18.50 dB  
PL13 18.50 dB  
SF02 400.1316005 MHz

F2 - Processing parameters  
SI 32768  
SF 100.6127690 MHz  
WDW EM  
SSB 0  
LB 1.00 Hz  
GB 0  
PC 1.40

178.71  
170.13  
160.40  
153.24  
148.43  
143.31  
135.04  
134.23  
130.75  
129.53  
129.22  
126.86  
121.28  
119.22  
110.26  
97.77

66.52  
58.63  
48.58  
40.64  
40.43  
40.22  
40.02  
39.81  
39.60  
39.39

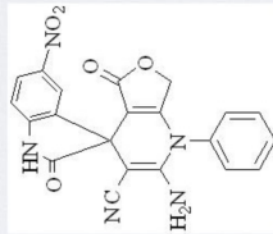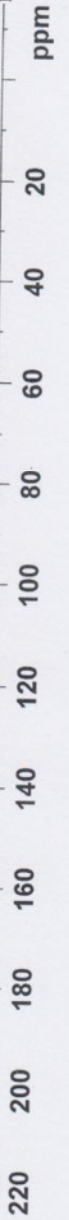

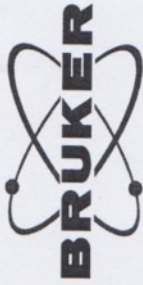

Current Data Parameters  
NAME 3H  
EXPNO 603  
PROCNO 1

F2 - Acquisition Parameters

Date 20130316  
Time 14.25  
INSTRUM spect  
PROBHD 5 mm Multinucl  
PULPROG zg  
TD 32768  
SOLVENT DMSO  
NS 16  
DS 0  
SWH 11574.074 Hz  
FIDRES 0.353213 Hz  
AQ 1.4156276 sec  
RG 1149.4  
DW 43.200 usec  
DE 6.00 usec  
TE 300.0 K  
D1 5.00000000 sec

===== CHANNEL f1 =====  
NUC1 LH  
P1 9.00 usec  
PL1 -6.00 dB  
SFO1 400.1324710 MHz

F2 - Processing parameters  
SI 32768  
SF 400.1300045 MHz  
WDW EM  
SSB 0  
LB 0.30 Hz  
GB 0  
PC 1.00

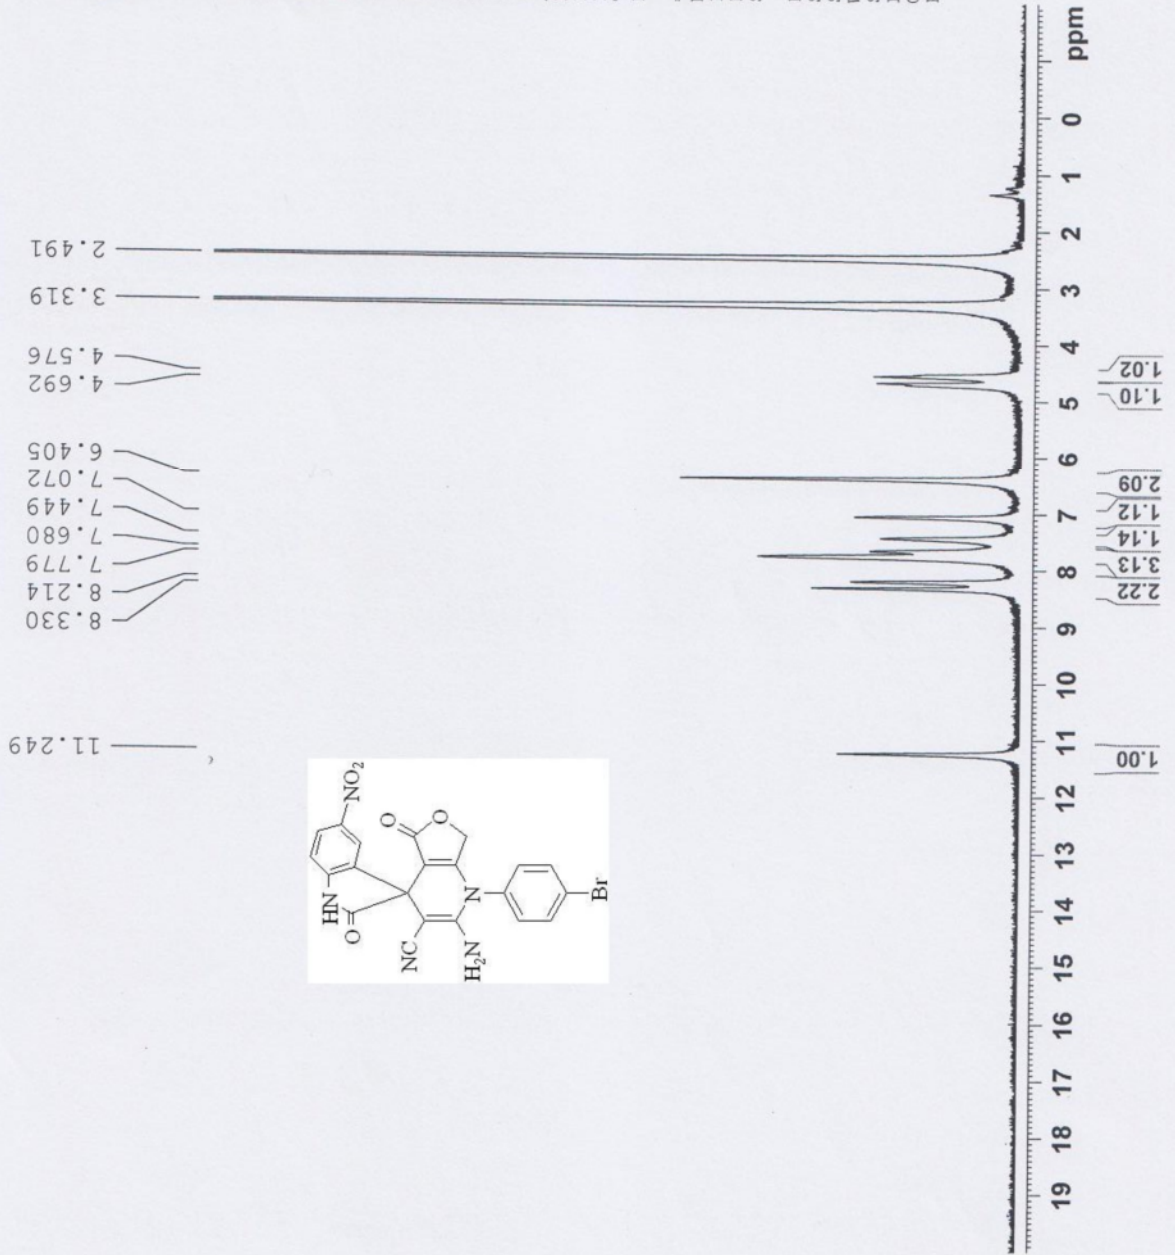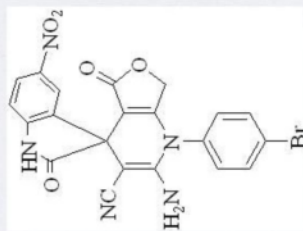

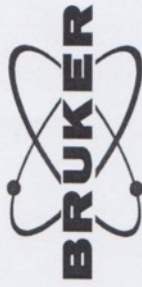

Current Data Parameters  
NAME Carbon13  
EXPNO 2133  
PROCNO 1

F2 - Acquisition Parameters

Date\_ 20130317  
Time\_ 10.17  
INSTRUM spect  
PROBHD 5 mm Multinucl  
PULPROG zgpg30  
TD 65536  
SOLVENT DMSO  
NS 1000  
DS 4  
SWH 40404.039 Hz  
FIDRES 0.616517 Hz  
AQ 0.8110580 sec  
RG 32768  
DW 12.375 usec  
DE 6.00 usec  
TE 300.0 K  
D1 1.00000000 sec  
d11 0.03000000 sec  
d12 0.00002000 sec

==== CHANNEL f1 =====  
NUC1 13C  
P1 7.50 usec  
PL1 -2.00 dB  
SFO1 100.6204965 MHz

==== CHANNEL f2 =====  
CPDPRG2 waltz16  
NUC2 1H  
PCPD2 80.00 usec  
PL2 -4.00 dB  
PL12 18.50 dB  
PL13 18.50 dB  
SFO2 400.1316005 MHz

F2 - Processing parameters  
SI 32768  
SF 100.6127690 MHz  
WDW EM  
SSB 0  
LB 1.00 Hz  
GB 0  
PC 1.40

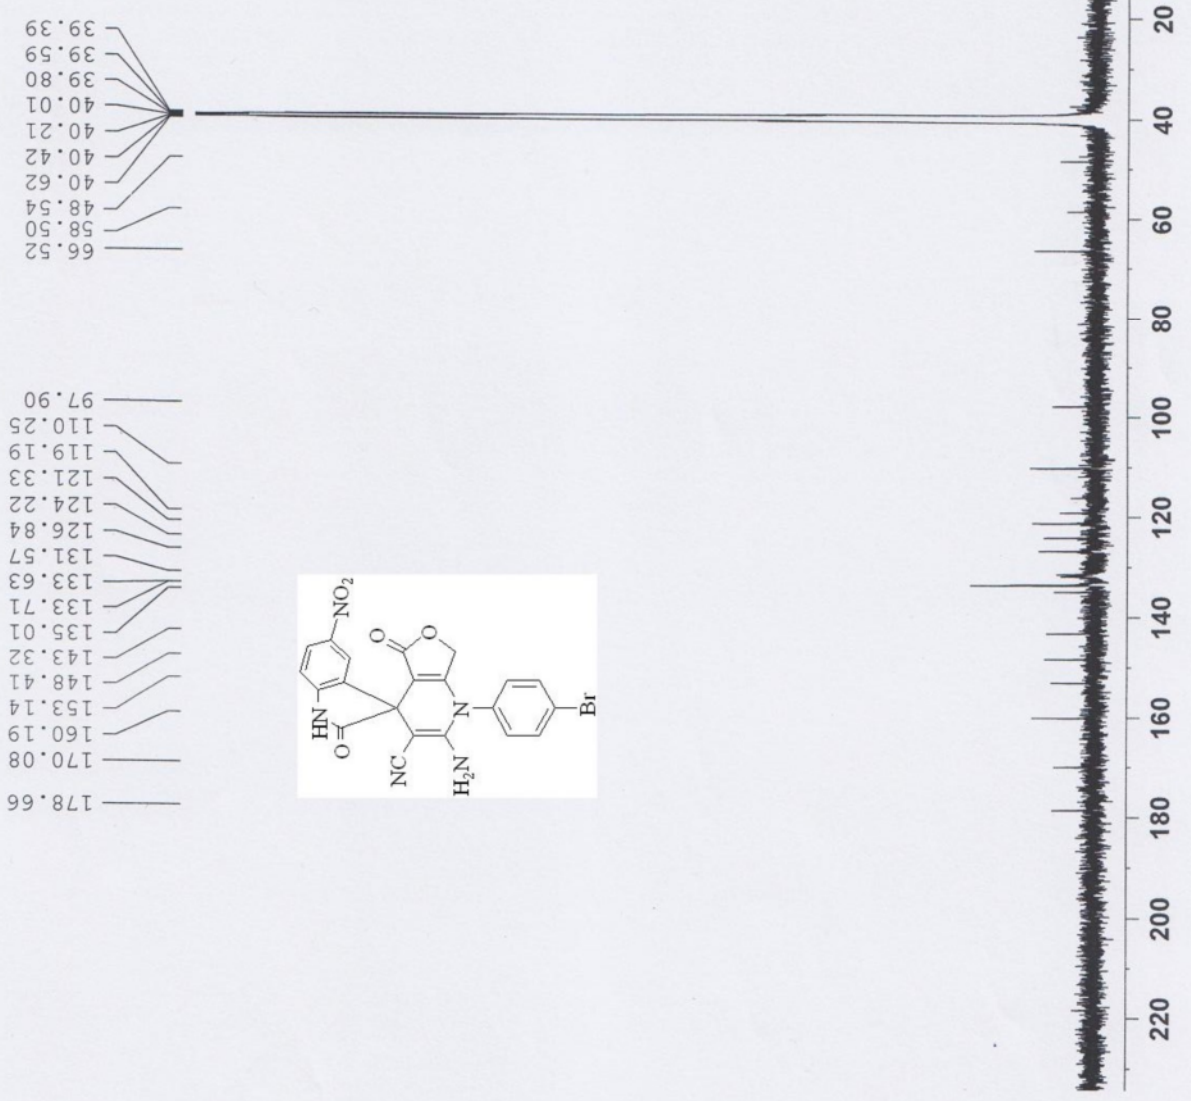

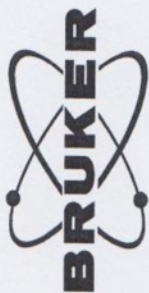

Current Data Parameters  
NAME 3H  
EXPNO 604  
PROCNO 1

F2 - Acquisition Parameters

Date\_ 20130316  
Time\_ 14.30  
INSTRUM spect  
PROBHD 5 mm Multinucl  
PULPROG zg  
TD 32768  
SOLVENT DMSO  
NS 16  
DS 0  
SWH 11574.074 Hz  
FIDRES 0.353213 Hz  
AQ 1.4156276 sec  
RG 1149.4  
DW 43.200 usec  
DE 6.00 usec  
TE 300.0 K  
D1 5.00000000 sec

==== CHANNEL f1 =====  
NUC1 1H  
P1 9.00 usec  
PL1 -6.00 dB  
SF01 400.1324710 MHz

F2 - Processing parameters  
SI 32768  
SF 400.1300045 MHz  
WDW EM  
SSB 0  
LB 0  
GB 0  
PC 1.00

11.247  
8.375  
8.213  
7.926  
7.628  
7.488  
7.071  
6.420  
4.740  
4.566  
3.313  
2.880  
2.716  
2.657  
2.489

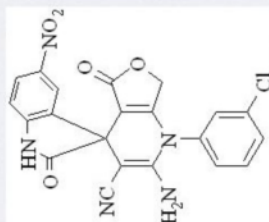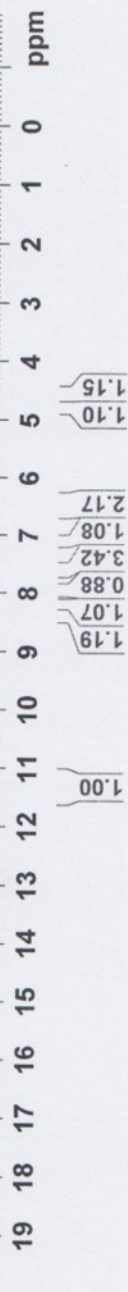

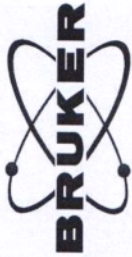

Current Data Parameters  
NAME Carbon13  
EXPNO 2149  
PROCNO 1

F2 - Acquisition Parameters

Date\_ 20130424  
Time\_ 15.10  
INSTRUM spect  
PROBHD 5 mm Multinucl  
PULPROG zgpg30  
TD 65536  
SOLVENT DMSO  
NS 2000  
DS 4  
SWH 40404.039 Hz  
FIDRES 0.616517 Hz  
AQ 0.8110580 sec  
RG 32768  
DW 12.375 usec  
DE 6.00 usec  
TE 300.0 K  
D1 1.00000000 sec  
d11 0.03000000 sec  
d12 0.00002000 sec

==== CHANNEL f1 =====  
NUC1 13C  
P1 7.50 usec  
PL1 -2.00 dB  
SFO1 100.6204965 MHz

==== CHANNEL f2 =====  
CFDPFG2 waitz16  
NUC2 1H  
PCPD2 80.00 usec  
PL2 -4.00 dB  
PL12 18.50 dB  
PL13 18.50 dB  
SFO2 400.1316005 MHz

F2 - Processing parameters  
SI 32768  
SF 100.6127690 MHz  
WDW EM  
SSB 0  
LB 1.00 Hz  
GB 0  
FC 1.40

178.70  
170.14  
160.15  
153.13  
148.37  
143.33  
135.50  
135.02  
134.59  
132.14  
130.96  
130.01  
129.63  
128.59  
128.25  
126.90  
121.47  
119.28  
110.26  
97.86

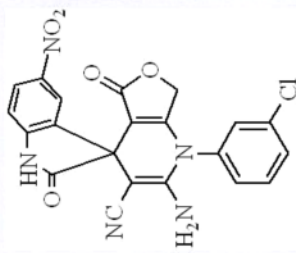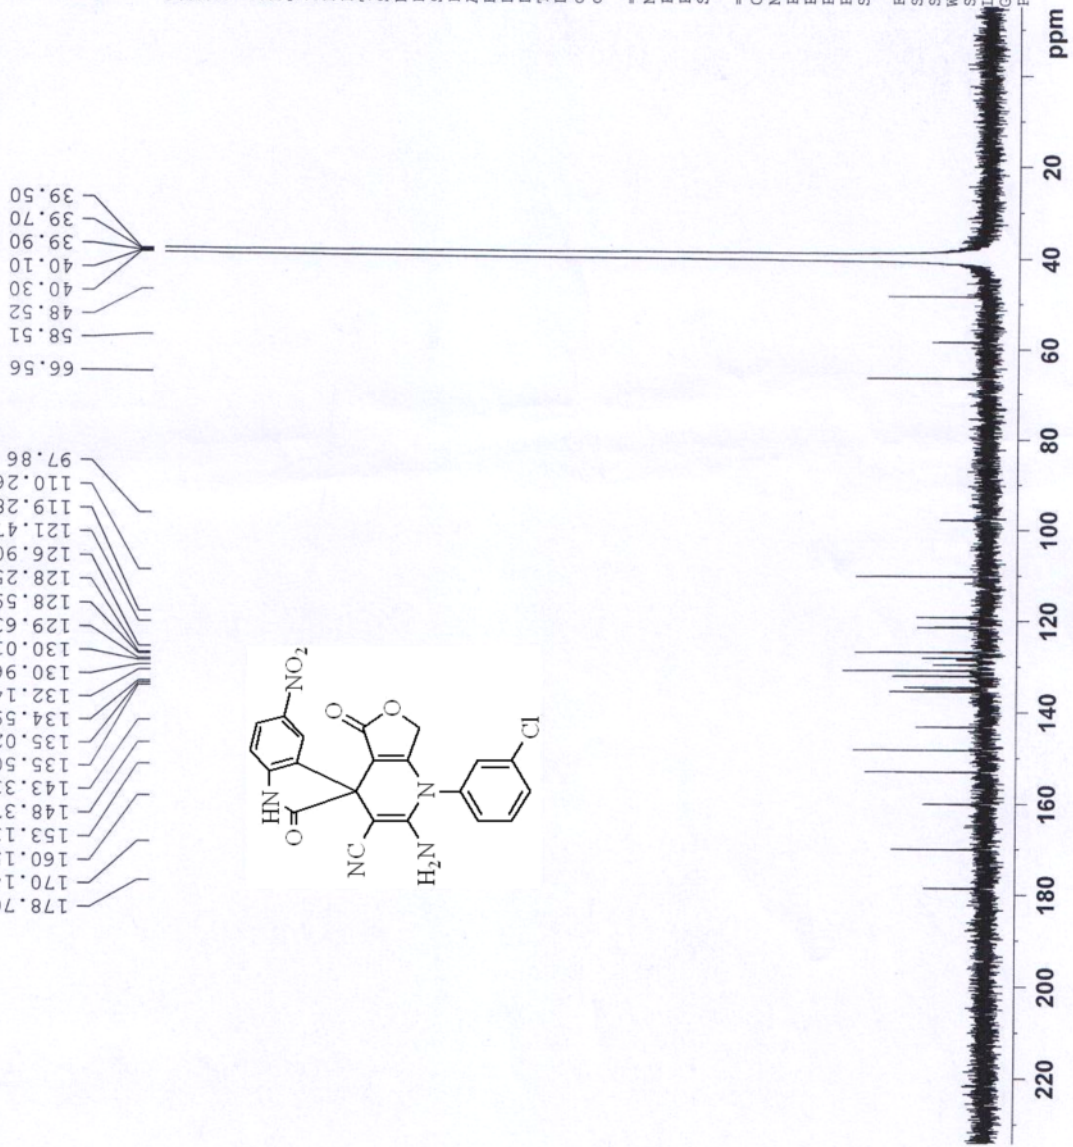

Supplement: c4ra05756b1.pdf [file c4ra05756b1.pdf]
